# Chemotactic behaviour of *Escherichia coli* at high cell density

Remy Colin<sup>1,2,\*</sup>, Knut Drescher<sup>1,2,3</sup> and Victor Sourjik<sup>1,2,\*</sup>

<sup>1</sup> Max Planck Institute for Terrestrial Microbiology

<sup>2</sup> Loewe Center for Synthetic Microbiology

<sup>3</sup> Fachbereich Physik, Philipps-Universität Marburg  
Karl-von-Frisch-Str. 16, 35043 Marburg

October 25, 2019

## Abstract

At high cell density, swimming bacteria exhibit collective motility patterns, self-organized through physical interactions of a however still debated nature. Although high-density behaviours are frequent in natural situations, it remained unknown how collective motion affects chemotaxis, the main physiological function of motility, which enables bacteria to follow environmental gradients in their habitats. Here, we systematically investigate this question in the model organism *Escherichia coli*, varying cell density, cell length, and suspension confinement. The characteristics of the collective motion indicate that hydrodynamic interactions between swimmers made the primary contribution to its emergence. We observe that the chemotactic drift is moderately enhanced at intermediate cell densities, peaks, and is then strongly suppressed at higher densities. Numerical simulations reveal that this suppression occurs because the collective motion disturbs the choreography necessary for chemotactic sensing. We suggest that this physical hindrance imposes a fundamental constraint on high-density behaviours of motile bacteria, including swarming and the formation of multicellular aggregates and biofilms.

---

\*To whom correspondence should be addressed.  
victor.sourjik@synmikro.mpi-marburg.mpg.de

E-mail: remy.colin@synmikro.mpi-marburg.mpg.de,

## 17 Introduction

18 When the cell density of a suspension of swimming bacteria increases, collective motion emerges, char-  
19 acterized by intermittent jets and swirls of groups of cells [1–3]. This behaviour is observed for many  
20 microorganisms not only in artificial but also in natural situations, often at an interface, e.g. when bac-  
21 teria swarm on a moist surface in the lab [4–8] or during infection [9], or at an air-water interface during  
22 formation of pellicle biofilms [1, 10]. Bacterial collective motion has been extensively studied experimentally  
23 [11–14] and theoretically [15–20], and it is known to emerge from the alignment between the self-propelled  
24 cells [21]. Two alignment mechanisms have been proposed, based either on steric interactions between the  
25 rod-like bacteria [22–24] or on the hydrodynamics of the flow they create as they swim [15, 17], which  
26 displays a pusher force dipole flow symmetry [3, 25, 26]. However, the relative importance of these two  
27 mechanisms has not been clearly established so far [27].

28 Bacterial collective motion contrasts to the behaviour of individual motile cells in dilute suspension,  
29 when bacteria swim in relatively straight second-long runs interrupted by short reorientations (tumbles),  
30 resulting at long times in a random walk by which they explore their environment [28]. Bacteria can  
31 furthermore navigate in environmental gradients by biasing this motion pattern: they lengthen (resp.  
32 shorten) their runs when swimming toward attractive (resp. repulsive) environment [28]. The biochemical  
33 signaling pathway controlling this chemotactic behaviour is well understood in *E. coli* [29, 30] and it is  
34 one of the best modeled biological signaling systems [31]. Bacteria monitor – via their chemoreceptors  
35 – the changes in environmental conditions and respond to them by modifying a phosphorylation signal  
36 transmitted to the flagellar motors to change the tumbling frequency accordingly [32, 33]. In *E. coli*,  
37 attractant substances repress the phosphorylation signal, which results in prolonged runs, repellents having  
38 the opposite effect. An adaptation module slowly resets the receptor sensitivity for further stimulations,  
39 via a negative feedback loop [34, 35]. This effectively allows the cell to compare its current situation to the  
40 recent past while swimming along a given direction [30], with a memory timescale of a few seconds [36, 37].  
41 Notably, the rotational Brownian motion of the cell body interferes with this mechanism of sensing by  
42 randomly changing the direction of swimming while temporal comparisons are performed [28, 29].

43 Although typically seen as a single-cell behaviour, chemotaxis also drives collective behaviours based on  
44 chemical interactions, such as autoaggregation [38, 39], self-concentration in patches [40, 41] and travelling  
45 band formation [42, 43], where the chemotactic response to self-generated gradients of chemoattractants  
46 leads to local cell density increases. However, very little is known about how the high-density physical  
47 interactions and the resulting collective motion influence the chemotactic navigation of bacteria [44, 45]:  
48 for example, it is unclear whether chemotaxis would be improved by alignments of convective flows with  
49 the gradient [19, 45] or instead compromised by random collisions between cells. This lack of knowledge  
50 is in part due to the technical difficulty of measuring the dynamics of cells in a dense suspension [20].  
51 Over the last few years, new image analysis methods have been developed or adapted to bacterial systems  
52 [2, 46–49], which exploit intensity fluctuations [46] or intensity pattern shifts [49] to characterize swimming  
53 and chemotaxis in populations of bacteria. These Fourier image analysis methods function at arbitrarily  
54 high cell densities, capture the dynamics of all cells without bias, and are at least as fast as the more  
55 commonly used particle tracking techniques.

56 In this paper, we use Fourier image analysis methods to investigate how the collective motion developing  
57 with increasing cell density affects the ability of *E. coli* populations to follow controlled chemical gradients  
58 in a microdevice. Our experimental results and computer simulations show that, after increasing up  
59 to a maximum at intermediate densities, chemotaxis is strongly reduced as collective motion developed  
60 in the sample. Collective reorientations act similarly to an active rotational diffusion interfering with  
61 the chemosensing mechanism. Additionally, the characteristics of the collective motion are consistent

62 with hydrodynamic interactions being the primary driver of its emergence, additional steric effects being  
63 important but secondary. These results have important implications for collective behaviours of motile  
64 bacteria at high density.

## 65 Results

### 66 Measuring chemotactic motion at variable cell density

67 To measure both the collective dynamics and the chemotactic response of populations of *E. coli* cells at  
68 varying density, we analyzed bacterial swimming in controlled gradients of a chemical attractant using  
69 a microfluidics setup, videomicroscopy and Fourier image analysis. Microfabricated devices made of the  
70 oxygen-permeable polymer poly-dimethylsiloxane (PDMS) were used as described previously [49] to create  
71 quasi-static linear gradients of the non-metabolizable attractant  $\alpha$ -methyl-D,L-aspartic acid (MeAsp) in a  
72 straight channel (Fig. 1a). This gradient could be mimicked using the fluorescent dye fluorescein (Fig 1b),  
73 which has a diffusion coefficient similar to the one of MeAsp ( $D \simeq 500 \mu\text{m}^2/\text{s}$ ). Three channel heights,  
74  $h = 50, 30$  and  $8 \mu\text{m}$ , were used to increasingly confine the cell suspensions towards two dimensions.  
75 Motility of suspensions of *E. coli* bacteria, measured in the middle of this gradient, was sustained for  
76 several hours at all cell densities (Supplementary Fig. 1a), due to oxygen availability and abounding  
77 energy source in the medium. When the density increased, the development of collective motion in the  
78 sample, characterized by the existence of collective eddies and jets of swimming cells was observed (Fig.  
79 2a) as expected [2, 13, 20]. The shape of the gradient, after the transient phase during which it becomes  
80 established, is largely unaffected by the collective motion (Fig. 1c), except at the highest bacterial cell  
81 body volume fractions. Consistently, the Peclet number, which compares diffusion and advective transport  
82 of MeAsp in an eddy, remains moderate ( $Pe = hv_f/D \leq 1$ , where  $v_f$  is the fluid velocity; see Supplementary  
83 Note 1), confirming that stirring by the bacteria has little effect on the diffusion of MeAsp [50]. Furthermore,  
84 in the present geometry, at steady state the gradient shape does not depend on the diffusion coefficient.  
85 Because the cell density slowly changes with time in the area of measurement due to the chemotactic  
86 accumulation, thus differing from the average cell density in the suspension, the cell body volume fraction  
87  $\Phi_c$  was measured *in situ* for each experiment (Supplementary Fig. 2 and Methods).

88 To further investigate the effect of cell elongation, which is typically observed for bacteria swarming on  
89 a wet hydrogel at high density [4], we compared normally-sized *E. coli* with average length  $L = 2 \mu\text{m}$  and  
90 cells elongated to an average of  $L = 4 \mu\text{m}$  upon treatment with cephalixin, a drug preventing cell division  
91 (Methods and Supplementary Fig. 2). We observed that the cephalixin treatment strongly increases cell  
92 autoaggregation, which is mediated in this *E. coli* strain by the adhesin Antigen 43 [38]. We then used  $\Delta flu$   
93 strain deleted for the gene encoding this adhesin for all results reported in this study, since, in absence of  
94 the cephalixin treatment,  $flu+$  and  $\Delta flu$  cells behave similarly, regarding both their collective motion and  
95 chemotaxis (Supplementary Fig. 3), and the elongated  $\Delta flu$  cells show normal motility (Supplementary  
96 Fig. 1).

### 97 Structure of the collective motion

98 The collective motion was measured in the gradient using an image velocimetry method derived from  
99 Phase Differential Microscopy [49] (Methods) to quantify the local velocity field  $\mathbf{v}(\mathbf{r})$ , averaged over several  
100 neighboring bacteria (Fig. 2a). The spatial structure of the flow field at varying cell volume fraction  $\Phi_c$

101 was characterized by the 2-dimensional power spectral density of the velocity field (Methods) [20]:

$$E(q) = q \left\langle \frac{\tilde{\mathbf{v}}(\mathbf{q}, t) \tilde{\mathbf{v}}^*(\mathbf{q}, t)}{A_0 \langle \mathbf{v}^2 \rangle} \right\rangle_{t, |\mathbf{q}|=q}, \quad (1)$$

102 with  $\tilde{\mathbf{v}}$  the spatial Fourier transform of  $\mathbf{v}$ ,  $\mathbf{q}$  the wave vector and  $A_0$  the area of the field of view. This  
 103 quantity  $E(q)$  (Fig. 2b) measures the distribution of kinetic energy over the flow structure sizes  $\pi/q$ , hence  
 104 representing the probability to observe a “vortex” of size  $\pi/q$  [20]. At  $\Phi_c \gtrsim 0.01$ , this flow structure  
 105 factor exhibits, at a low wave number  $q_{\max}$ , a maximum  $E(q_{\max})$ , which grows in amplitude as the cell  
 106 volume fraction increases (Fig. 2b). After an initial decrease, the value of  $q_{\max}$  reaches a plateau  $q_{\text{str}}$   
 107 at moderate cell volume fraction, corresponding to  $E(q_{\max}) \gtrsim 15 \mu\text{m}$  (Supplementary Fig. 4a). Fully  
 108 developed collective motion thus takes the form of flow structures (eddies) with a specific size,  $\pi/q_{\text{str}}$ . An  
 109 increase in cell density results in an increase of the amount of collective flow of this size – the amplitude  
 110 of the collective motion, which can be quantified by  $E(q_{\text{str}})$ . Interestingly,  $q_{\text{str}}$  is apparently determined by  
 111 the height  $h$  of the channel (Fig. 2c inset and Supplementary Fig. 4a), indicating that the flow structures  
 112 are constrained by the system size. The observed decrease of  $q_{\max}$  at low cell volume fraction might be due  
 113 to a combination of  $E(q_{\max})$  reaching the noise level, represented by the featureless  $E(q)$  observed at the  
 114 lowest cell volume fractions (Fig. 2b), and a genuine reduction of the eddy size when  $\Phi_c$  becomes low.

115 For simplicity, the amplitude of the collective motion was quantified by  $\Delta E(q_{\text{str}})$  at all volume fractions  
 116 (Fig. 2c), i.e.  $E(q_{\text{str}})$  (Supplementary Fig. 4b, c) corrected for background noise. We observed that  
 117  $\Delta E(q_{\text{str}})$  tends to grow more slowly with volume fraction for more confined suspensions (lower  $h$ ). At  
 118 moderate confinement ( $h = 30$  and  $50 \mu\text{m}$ ),  $\Delta E(q_{\text{str}})$  also grows more slowly for longer cells, whereas for  
 119  $h = 8 \mu\text{m}$  it is on the contrary a single function of  $\Phi_c$  for both cell lengths (Fig. 2c). Importantly, when  
 120 normalized to its value at high  $\Phi_c$ ,  $\Delta E(q_{\text{str}})$  was found to be for all conditions a single function of the flux of  
 121 bacterial mass integrated over the vortex size  $\Phi_c v_0 \pi/q_{\text{str}}$ , where  $v_0$  is the population-averaged swimming  
 122 speed of the cells (Supplementary Fig. 4d). For  $\Phi_c \lesssim 0.01$ ,  $v_0$  itself is on average constant at a value  
 123 between 10 and  $25 \mu\text{m/s}$  which depends on cell length and the degree of confinement, and also tends to  
 124 vary between biological replicates (Supplementary Fig. 1b, c). At  $\Phi_c \gtrsim 0.01$ ,  $v_0$  progressively increases, by  
 125 a factor of up to two, as  $\Delta E(q_{\text{str}})$  grows and the collective motion developed, consistently with previously  
 126 reported behaviour [2].

## 127 Dependence of chemotaxis on cell density

128 The chemotactic response of the cells to the MeAsp gradient was first quantified using their chemotactic  
 129 drift velocity  $v_{\text{ch}}$ , i.e. the population-averaged speed of displacement up the gradient, measured as detailed  
 130 in Methods following Colin *et al.* [49]. The gradient of MeAsp concentration (from 0 to  $200 \mu\text{M}$  in 2 mm)  
 131 was chosen to maximize  $v_{\text{ch}}$  at low cell density [49]. For all combinations of cell length  $L$  and channel  
 132 height  $h$ , we observed that the chemotactic drift  $v_{\text{ch}}$  first tends to increase when the cell volume fraction  $\Phi_c$   
 133 increases in the range  $5 \cdot 10^{-4} - 0.01$ . It then strongly decreases above a cell volume fraction  $\Phi_c$  that depends  
 134 on  $L$  and  $h$ , corresponding to the one above which collective behaviour is observed (Fig. 3a). Consistently,  
 135 the drift decreases as function of  $\Delta E(q_{\text{str}})$ , albeit differently for each  $L$  and  $h$  (Supplementary Fig. 5).  
 136 Swirling collective motion thus clearly impairs the ability of the cells to perform chemotaxis.

137 Since the chemotactic drift depends both on the cell swimming speed and on their ability to bias their  
 138 direction of motion towards the gradient – the chemotactic efficiency, we aimed to separate these two  
 139 contributions by normalizing  $v_{\text{ch}}$  to the swimming speed  $v_0$ . For non-interacting cells in 3D in a chemical  
 140 gradient, they are expected to be related by [51–53]:

$$v_{\text{ch}} = G v_0^2 \tau (\tau_{\text{m}}, \tau_{\text{T}}, \tau_{\text{R}}) \nabla f(c), \quad (2)$$

141 where  $G$  is the total gain of the chemotaxis system,  $f(c)$  is the part of the chemoreceptor free energy  
142 difference due to the binding of chemical ligand, present at concentration  $c$  and  $\tau$  is the typical time during  
143 which the bacterium is able to measure a change of  $f(c)$  in a given direction. The latter depends on the  
144 memory time scale  $\tau_m$  as well as on two reorientation times. The first is due to Brownian rotational diffusion  
145 during the runs,  $\tau_R = 1/D_r$ , with  $D_r$  the rotational diffusion constant of isolated cells. The other is due to  
146 tumbling,  $\tau_T = \tau_0/(1 - \exp(-D_T\tau_T))$ , with  $\tau_0$  the steady state tumbling rate and  $D_T\tau_T$  the mean squared  
147 angular change during tumbles. It is expected from previous studies [51, 52, 54] that (Supplementary Note  
148 2):

$$\tau = \frac{\tau_R}{\tau_R + \tau_T} \frac{\tau_T}{1 + \tau_T/\tau_R + \tau_T/\tau_m}. \quad (3)$$

149  
150 In absence of interactions, according to Eq. 2, the chemotactic coefficient  $v_{ch}/v_0^2$  depends only on  
151 internal – fixed – parameters of the chemotaxis pathway and on the fixed concentration profile. This  
152 quantity was therefore chosen to quantify chemotactic efficiency at all densities, although at high densities  
153 cell behaviour might deviate from Eq. 2. We observed that the chemotactic coefficient  $v_{ch}/v_0^2$ , like the  
154 chemotactic drift, tends to increase with volume fraction, peaks at a condition-dependent  $\Phi_c$  around  
155 0.01, before decreasing sharply – by a factor of up to 100 – as the collective motion develops (Fig. 3b).  
156 We therefore concluded that both the intermediate maximum of  $v_{ch}$  and its subsequent reduction by the  
157 collective motion arise from cell-density effect on the chemotactic efficiency, and that the moderate increase  
158 in swimming speed at high cell density cannot compensate for the much stronger density dependence of  
159 the chemotactic coefficient.

160 Chemotaxis was also found to be affected by cell length and channel height. Even at low cell volume  
161 fraction, if cells are longer or in a higher channel, they have a higher chemotactic coefficient  $v_{ch}/v_0^2$  (Fig.  
162 3b). Cell elongation is indeed expected to result in increased chemotactic coefficient in steady gradients [55],  
163 because of the lower Brownian rotational diffusion of longer cells [51] and their expected reduced tumbling  
164 angle [42, 56]. To directly compare the pure effect of cell density under various  $L$  and  $h$ , chemotactic  
165 coefficients were normalized to the average value at low volume fractions ( $\Phi_c < 0.0015$ ) in each condition  
166 (Fig. 3c). Even this normalized chemotactic coefficient is significantly higher for longer cells at  $\Phi_c > 0.01$   
167 under moderate confinement ( $h = 50$  and  $30 \mu\text{m}$ , Fig. 3b). It is however a single function of  $\Phi_c$ , irrespective  
168 of cell length, for  $h = 8 \mu\text{m}$  (Fig. 3c).

169 The behaviour of the chemotactic coefficient is thus reminiscent of the one of  $E(q_{str})$ . Indeed, the  
170 normalized chemotactic coefficient was found to be a single function of the amplitude of the collective  
171 motion  $\Delta E(q_{str})$ , irrespective of the cell length and channel height (Fig. 3d), decreasing exponentially as a  
172 function of  $\Delta E(q_{str})$  from its low density value. The amplitude of the collective motion therefore appears  
173 to determine the reduction of the ability to follow gradients, irrespective of vortex size  $\pi/q_{str}$ , for  $\Phi_c \gtrsim 0.01$ ,  
174 in all conditions.

## 175 Collective reorientations impair chemotaxis

176 As the indirect effect of gradient distortion by the swimming bacteria could be ruled out (Fig. 1), we  
177 hypothesized that the observed reduction of chemotaxis at high density is due to the forced reorienta-  
178 tions resulting from the physical interactions, which would interfere with the sensing mechanism based on  
179 temporal comparisons: As the cell is swimming, it monitors the change in chemoattractant concentration  
180 within a few seconds, to decide whether to tumble. If during this time the direction in which the cell swims  
181 has changed significantly, the decision becomes less relevant, thus making the biochemically hard-wired  
182 bacterial chemotaxis strategy inefficient. In this hypothesis, collective reorientations would then act anal-



183 ogous to an enhancement of rotational diffusion, where the time scale of sensing  $\tau$  would decrease because  
 184  $D_r$  effectively increases [52, 53, 57], reducing the chemotactic coefficient accordingly (Eq. 2 and 3).

185 To test whether collective reorientations may indeed reduce chemotactic drift, we performed numerical  
 186 simulations of a population of self-propelled chemotactic rods of variable aspect ratio  $L$  in a viscous medium,  
 187 with the cell motion being confined to two dimensions. The cells interact sterically upon contact as well  
 188 as hydrodynamically (Fig. 4a), being transported and reoriented by the flow generated by the other cells,  
 189 which were approximated as pusher force dipoles in Hele-Shaw geometry [8, 58]. The strength and reach  
 190 of the hydrodynamic interaction is channel-height dependent in this approximation because of viscous  
 191 friction on the walls (Methods and Supplementary Fig. 6). Rods reorient rotationally when tumbling, with  
 192 the tumbling probability being determined according to the concentration of chemoattractant experienced  
 193 by the rod, using a model of the chemotaxis system of *E. coli* [59]. They also are subject to rotational  
 194 Brownian motion, with the rotational diffusion coefficient  $D_r$  being smaller for longer cells [55].

195 When the cell area fraction increases in the simulations, the rods form increasingly large swirling packs  
 196 of cells, similarly to previous reports, whether hydrodynamic interactions are present [8, 14, 20, 58] (full  
 197 simulations, Fig. 4b) or not [23, 24] (steric-only simulations, Supplementary Fig. 7). However, qualitatively  
 198 better agreement with experiments is achieved when hydrodynamic interactions are taken into account,  
 199 suggesting that they are the primary contributor to the emergence of the collective motion in this case.  
 200 Notably, when hydrodynamics is accounted for, the flow structure factor  $E(q)$  peaks at a  $q_{str}$  which depends  
 201 only on channel height and not on cell density or cell length, in agreement with experiments (Fig. 4c),  
 202 although the simulated vortex size is smaller than the experimental one. In contrast, when only steric  
 203 interactions are simulated,  $q_{str}$  clearly depends on cell length (Supplementary Fig. 7d). The dependences  
 204 of simulated  $E(q_{str})$  on channel height, cell length and cell density in the full simulations are similar to the  
 205 experiments (Fig. 4d). Similarly, the swimming speed  $v_0$  increases in the full simulations, although to a  
 206 lesser extent than in the experiments, whereas it decreases in the steric-only case (Supplementary Fig. 8),  
 207 suggesting that this increase is due to hydrodynamic entrainment and further confirming the importance  
 208 of hydrodynamic interactions in the emergence of the collective motion.

209 In the full simulations, the chemotactic coefficient  $v_{ch}/v_0^2$ , plotted as a function of cell body area  
 210 fraction, decreases at the cell densities where the collective motion develops (Fig. 4e). However, contrary  
 211 to the experiments, no increase in chemotactic coefficient is observed at intermediate cell area fractions.  
 212 Nevertheless,  $v_{ch}/v_0^2$  does scale with  $E(q_{str})$ , as in the experiments, although with a sharper decrease (Fig.  
 213 4f). In the steric-only simulations,  $v_{ch}/v_0^2$  instead peaks as a function of cell area fraction at high densities  
 214 but it is not a single function of  $E(q_{str})$  (Supplementary Fig. 7e).

215 Finally, we took advantage of having access to all single cell trajectories in the simulations to gain more  
 216 insight into the mechanism of chemotactic drift reduction. The time autocorrelation of the individual cell  
 217 velocity  $\mathbf{v}_i$ ,  $C_v(t) = \langle \mathbf{v}_i(t+t_0) \cdot \mathbf{v}_i(t_0) \rangle_{i,t_0} / \langle \mathbf{v}_i^2(t_0) \rangle_{i,t_0}$ , shows a faster decorrelation as cell density increases  
 218 for all values of  $h$  and  $L$ , because of the collective reorientations (Fig. 4g). We used the decorrelation time,  
 219 defined as  $C_v(\tau_{dec}) = 0.5$ , as a measure of directional persistence (Supplementary Fig. 9a). In absence of  
 220 all physical interactions, the decorrelation time depends on the Brownian and tumbling reorientation times  
 221 as  $1/\tau_{dec} = 1/\tau_R + 1/\tau_T$ , and combining Eq. 2 and 3, the chemotactic coefficient can be written as:

$$\langle v_{ch}/v_0^2 \rangle = \frac{\tau_{dec}^2/\tau_T}{1 + \tau_{dec}/\tau_m} G \nabla f(c). \quad (4)$$

222 At higher cell densities,  $\tau_{dec}$  also includes collective reorientations,  $1/\tau_{dec} = 1/\tau_R^{eff} + 1/\tau_T$ , with  
 223  $1/\tau_R^{eff} = 1/\tau_R + 1/\tau_C$  an effective rotational diffusion rate including Brownian ( $\tau_R$ ) and collective ( $\tau_C$ )  
 224 reorientation times. Despite this additional contribution of collective motion, the dependence of the simu-  
 225 lated chemotactic coefficient as a function of  $\tau_{dec}$  is found to follow Eq. 4 very well at all densities, with

226 the computed – and not fitted – coefficient values given in Supplementary Table 2, for all conditions in  
227 the full simulations (Fig. 4h). The effect of simulated collective motion can therefore be interpreted as  
228 an active enhancement of rotational diffusion, which decreases  $\tau_R^{\text{eff}}$ , hence  $\tau_{\text{dec}}$  and the drift. In contrast,  
229 the chemotactic coefficient does not match well the dependence on the reorientation time predicted by Eq.  
230 4 when only steric interactions are taken into account (Supplementary Note 3 and Supplementary Fig.  
231 6h). Notably, the reorientations coming from physical cell-cell interactions do not necessarily respect the  
232 detailed balance of cell orientation fluxes, as Brownian rotational diffusion does, which may explain the  
233 deviations from Eq. 4 that we observed even when the hydrodynamic interactions are taken into account  
234 (Supplementary Note 4 and Supplementary Figs. 9 and 10).

## 235 Discussion

236 Although the principles of bacterial chemotactic sensing are fairly well understood for a single cell [29, 31],  
237 little was known about the effects of physical interactions between cells on chemotaxis, despite their frequent  
238 occurrence during self-concentration processes [38–43] and high-density collective motility [4, 5, 10]. While  
239 the physical properties of the collective motion, e.g. in a swarming colony, are largely unaffected by activity  
240 of the chemotaxis pathway [58, 60, 61], the reverse is not necessarily true. Here, we thus used suspensions  
241 of *E. coli* in a controlled environment as a model system to investigate the effect of collective motion,  
242 emerging when cell density increases, on chemotactic sensing.

243 We observed that the size of bacterial flow structures in fully developed collective motion is set by  
244 the smallest system size, the channel height, independently of cell length and volume fraction, and that  
245 an increasing amount of the kinetic energy of the system gets poured into this flow structure as the  
246 cell density increases. This property strongly suggests that hydrodynamics plays the primary role in the  
247 emergence of the collective motion, since, in the Hele-Shaw geometry of our system, the channel height  
248 sets the reach of the hydrodynamic interaction [8], fundamentally because of viscous friction on its top and  
249 bottom walls. Previous works also predicted that the largest possible flow structure – set by system size  
250 – dominates in hydrodynamics-based collective motion [15, 62]. Also consistent with previous simulations  
251 of such motion [63] is the observed reduction of the total kinetic energy at fixed  $\Phi_c$  but under increased  
252 confinement. Interestingly, similar flow properties are observed for the hydrodynamics-based collective  
253 flows during sedimentation of dense suspensions of passive particles [64, 65]. Consistently, our numerical  
254 simulations show that considering hydrodynamic interactions is key to reproduce the main experimental  
255 features, including the dependence of the vortex size on channel height, and its independence of cell  
256 length. Although the simulated vortex size is smaller than in the experiments, such shifts were previously  
257 observed on other quantities for this type of model [58]. Notably, besides the channel height, hydrodynamic  
258 interactions also set another characteristic length in our system, the hydrodynamic dipole length. This  
259 might explain the apparent saturation of the vortex size at about  $20\ \mu\text{m}$  in the experiments, when the  
260 channel height approaches the estimated dipole length ( $\sim 6\ \mu\text{m}$ ).

261 Physical interactions between cells at high densities result in a strong reduction and ultimately in the  
262 abolishment of the specific ability of *E. coli* to track chemical gradients, and thus of the chemotactic drift,  
263 despite the moderate increase in swimming speed due to collective entrainment. The collective motion is  
264 the driver of this decrease, with its amplitude  $E(q_{\text{str}})$  being the sole determinant of reduced chemotactic  
265 efficiency. Collective motion acts directly on the mechanism of gradient-sensing since the gradient itself  
266 is little affected. Our analysis based on agent-based simulations suggests that this reduction is induced  
267 by an increased reorientation rate of cell bodies due to the collective motion, whether it emerges from  
268 steric or hydrodynamic interactions, which in this sense acted similarly to an active rotational diffusion.

269 Importantly, we conclude that Eq. 2 derived for non-interacting swimmers can describe the chemotactic  
270 drift well at all densities, provided that the time scale of rotational diffusion is set to account not only for  
271 Brownian but also for interaction-induced reorientations. A similar reduction of chemotaxis by forced cell  
272 reorientations could be expected in other contexts, such as cells swimming in circles near surfaces [66] or  
273 during migration through a porous medium where cells collide with obstacles [67, 68].

274 In contrast to the inhibition at high densities, the chemotactic drift is enhanced between low and  
275 intermediate densities. Although the nature of this increase remains to be elucidated, it is unlikely to result  
276 from self-attraction [38, 39] or other chemical effects, as its extent depends on the degree of confinement  
277 and on cell length. In the simulations, a similar enhancement is observed when only steric interactions  
278 are considered – but not with the full model including hydrodynamic interactions, although it is not clear  
279 whether the nature of the transient enhancement in those simulations is the same as in the experiments.  
280 This discrepancy, along with the other quantitative differences between experiments and simulations, could  
281 potentially be explained by a number of factors our hydrodynamic simulations do not account for, such as  
282 collisions with the top and bottom channel walls and other physical effects neglected by two-dimensional  
283 confinement, flagellar entanglements and fluid flows affecting the flagellar bundles stability [69], as well as  
284 the point force approximation.

285 The observed regulation of chemotactic behaviour through physical interactions among motile cells  
286 has several important consequences for bacterial high-density behaviours. First, it provides a physical  
287 mechanism that might regulate chemotactic accumulation of bacteria near sources of chemoattractants  
288 (e.g., nutrients), because gradually increasing cell density [70] would initially promote and subsequently  
289 limit the process. Indeed, this effect could explain why the density of cells entering a capillary filled with  
290 chemoattractant saturates as a function of the cell density in the suspension [71]. The density for which  
291 the chemotactic drift is maximal,  $\Phi_c \simeq 0.01$ , which should play a cut-off role, is indeed the typical maximal  
292 cell density reached within travelling chemotactic bands which form through a self-generated gradient  
293 [42, 43]. Thus, the hitherto neglected effects of physical interactions should be taken into account when  
294 describing these phenomena, in conditions for which the density gets high. Second, the observed strong  
295 reduction in chemotactic drift at cell densities typical of swarming ( $\Phi_c \sim 0.30$ ) [5] suggests that, without  
296 specific counteracting mechanisms, chemotactic navigation of bacteria swimming within a swarm is nearly  
297 impossible, consistent with recent indications that the swarm expansion rate is set by the cell growth rate  
298 rather than motility [8]. Interestingly, we observed that cell elongation, one of the major hallmarks of  
299 swarming bacteria [4], indeed improved chemotaxis at high  $\Phi_c$  under moderate confinement. However,  
300 it appeared to have little effect under stronger confinement expected in the swarm. Bacterial swarming  
301 was already known to be unaffected by the lack of functional chemotactic sensing [60, 61]. Although  
302 more prominent steric interactions within a swarming colony [7, 8] might potentially improve tracking of  
303 gradients at high density, as could other differences in swimming behaviour [72, 73], or additional cohesive  
304 interactions [44] caused by cell differentiation in a swarm, our results suggest that the emergence of swirling  
305 collective motion fundamentally undermines the chemotactic behaviour.

## 306 Methods

### 307 Strains and cell culture

308 *Escherichia coli* strain W3110 (RpoS+), *flu+* or  $\Delta$ *flu* [38], were grown at 34 °C in Tryptone Broth (TB)  
309 from a 100-fold dilution of overnight culture to an optical density at 600 nm  $OD_{600} = 0.7$ . Where applicable,  
310 the culture was supplemented with 0.01 % cephalixin at one division time (1 h) before harvesting the cells.  
311 Cells were washed thrice and resuspended in motility buffer (10 mM  $KPO_4$ , 0.1 mM EDTA, 67 mM NaCl,



312 pH 7.0) supplemented with 55 mM glucose as energy source, cooled to 4 °C for 20 min to reduce metabolic  
313 activity and then concentrated by centrifugation ( $1.5 \cdot 10^3$  g, 7 min) to a final cell density of  $\Phi_c \sim 0.20$   
314 ( $OD_{600} \sim 100$ ). Series of dilutions were then performed in motility buffer, so that the amount of glucose  
315 per cell remains constant for all cell densities ( $\sim 0.5$  mM/ $OD_{600}$ ).

## 316 Microfabrication

317 Molds were fabricated using standard photolithography and microfabrication techniques. The SU8 pho-  
318 toresist (Microchem™) was spincoated on a silicon wafer for 90 s, covered with a positive mask of the  
319 device, produced using AutoCAD and printed by JD Photo Data (UK), and exposed to UV light, baked  
320 and developed according to manufacturer instructions. SU8 grade and spincoat speeds are indicated in  
321 Supplementary Table 1. Poly-di-methylsiloxane (PDMS), in a 1:10 crosslinker to base ratio, was poured on  
322 the cast, degazed, baked overnight at 70° C, peeled off, cut to shape and covalently bound on isopropanol-  
323 rinsed microscopy glass slides after oxygen plasma treatment. PDMS to glass covalent bounds were allowed  
324 to form for 15 minutes at room temperature and the devices were then filled with sterile DI water for short  
325 term storage (few hours), in order to retain their hydrophilic properties.

## 326 Chemotaxis assay

327 The assay was described in detail previously [49]. In the microfluidic device (Fig. 1a), the two reservoirs  
328 were filled with cell suspensions of the same volume fraction supplemented with either no or 200  $\mu$ M  $\alpha$ -  
329 methyl-D,L-aspartic acid (MeAsp), and then sealed to avoid residual flows. The MeAsp gradient formed in  
330 the 2 mm long, 1 mm wide, channel connecting them. Bacterial motion in the middle of the channel was  
331 recorded thrice, at one hour interval, at mid-height, in phase contrast microscopy at 10 $\times$  magnification,  
332 using a Mikrotron 4CXP camera (1 px = 1.4  $\mu$ m, field of view  $A_0 = 512 \times 512$  px<sup>2</sup>, 1 ms exposure) running  
333 at 100 frames/s (fps).

## 334 Gradient calibration

335 For gradient calibration experiments, the suspensions - at various cell densities - in the second reservoir  
336 were supplemented with 100  $\mu$ M fluorescein as well as attractant. The gradient was measured in wide-field  
337 fluorescence microscopy (excitation filter 470/40, emission 525/50) at 10 $\times$  magnification. Images were  
338 recorded using an Andor Zyla 4.2 sCMOS camera in the middle of the channel and in the attractant  
339 reservoir, the former being divided by the latter to correct for inhomogeneous illumination.

## 340 Motility measurements by Fourier image analysis

341 Cell motility was quantified by analysing the movies with three different algorithms. The first is differential  
342 dynamic microscopy (DDM), a now well established technique [46, 47], computing differential image corre-  
343 lation functions (DICF), which were fitted to extract the average swimming speed of the population of cells  
344  $v_0$  and the fraction of swimming cells  $\alpha$ , as well as the local cell density (see below). The shortcomings due  
345 to the breakdown of two assumptions of Wilson *et al.* [46] – even distributions of swimming directions and  
346 round cell images – were accounted for via calibrations (see below). Second, phase differential microscopy  
347 ( $\Phi$ DM) [49] determined the population averaged drift velocity of the population of cells  $v_d = \langle v_x(i, t) \rangle_{i,t}$ ,  
348 with positive  $x$  being the up-gradient direction,  $i$  cell index and  $t$  frame number. The chemotactic velocity,  
349 corrected for the fraction of non swimming cells, is then  $v_{ch} = v_d/\alpha$ . Lastly, maps of the local velocity  
350 field were obtained by using a local  $\Phi$ DM algorithm described in detail below. This image velocimetry

351 technique estimated the velocity of a group of few cells located within a region  $5 \mu\text{m}$  in diameter around a  
 352 position  $\mathbf{r} = (x, y)$ . The local velocity field  $\mathbf{v}(\mathbf{r}, t)$  was thus calculated for each time point  $t$ , and its spatial  
 353 Fourier transform,  $\tilde{\mathbf{v}}(\mathbf{q}, t) = \iint d\mathbf{r} \mathbf{v}(\mathbf{r}, t) \exp(-i\mathbf{q}\cdot\mathbf{r})$ , then led to the flow structure factor via Eq. 1.

### 354 Local image velocimetry algorithm

355 The image analysis algorithm is as follows, with parameter values as chosen for our analysis: In a movie  
 356 of  $T = 10^4$  frames of size  $A_0 = L_0 \times L_0$  pixels ( $L_0 = 512$ ), the local velocities are computed at points  
 357 situated on a square lattice spaced by a distance  $da = 4$  px, starting from a distance  $a/2$  from the edges of  
 358 the frame ( $a = 32$  px). For this, submovies of size  $a \times a$  are considered, each centered on one of the points  
 359 (represented by the index  $k$  in the following) . The spatial discrete Fourier transform of the blurred time  
 360 frame  $t$  in the submovie  $k$  is computed as:

$$I_k^{bl}(\mathbf{q}, t) = \iint d\mathbf{r} I_k(\mathbf{r}, t) \exp(-\mathbf{r}^2/l^2) \exp(-i\mathbf{q}\cdot\mathbf{r}), \quad (5)$$

361 where  $r = 0$  in the center of the submovie and  $l = 3$  px is a filtering range. The size of the group of cells, for  
 362 which the instantaneous velocity is computed, can thus be tuned independently of the Fourier transform  
 363 parameters. Changes in pixel intensities at a distance farther than  $l$  will not contribute to the evaluation  
 364 of the velocity at the point considered.

365 In the fashion of  $\Phi\text{DM}$  [49], the phase  $\delta\phi_k(\mathbf{q}, t)$  of the complex correlator  $I_k^{bl}(\mathbf{q}, t + 1)I_k^{bl}(\mathbf{q}, t)^*$  is  
 366 computed and summed to get  $\phi_k(\mathbf{q}, t) = \sum_{t'=0}^{t-1} \delta\phi_k(\mathbf{q}, t')$ . This phase is fitted as a function of  $\mathbf{q}$  to get  
 367 the cummulated displacement  $\mathbf{r}_k(t)$ ,  $\phi_k(\mathbf{q}, t) = \mathbf{q} \cdot \mathbf{r}_k(t)$  [49]. The local instantaneous velocity  $\mathbf{v}_k(t)$  is then  
 368 computed by fitting:

$$\mathbf{r}_k(t') = \mathbf{r}_k(t) + \mathbf{v}_k(t)(t' - t) \quad (6)$$

369 on a range of  $\tau = 20$  frames centered on  $t$ . Note that this method for measuring local displacements is equiv-  
 370 alent to particle image velocimetry (PIV), since the phase of the correlation in Fourier space corresponds  
 371 to the peak of the image cross-correlation in real space used in PIV to measure such displacement.

### 372 *In situ* measurement and calibration of cell body volume fraction

373 Chemotaxis microfluidic chips without a chemoattractant gradient were filled with suspensions of defined  
 374 cell concentration, measured by  $\text{OD}_{600}$ . The differential image correlation functions (DCIF)  $g(q, \tau) =$   
 375  $\langle |I(\mathbf{q}, t + \tau) - I(\mathbf{q}, t)|^2 \rangle_{t, |\mathbf{q}|=q}$  were computed from DDM and fitted according to

$$g(q, \tau) = a_0(q) + a_1(q)(1 - f(q, \tau)), \quad (7)$$

376 where  $f(q, \tau)$  is the intermediate scattering function yielding the cells average swimming speed and fraction  
 377 of swimmers [46, 47]. The amplitude  $a_1 \simeq g(q, +\infty) = 2\langle |I(\mathbf{q}, t)|^2 \rangle_{t, |\mathbf{q}|=q}$  is expected to scale as  $a_1(q) \sim$   
 378  $f(N_{\text{part}})\langle I \rangle^2 F(q)S(q)$ , where  $N_{\text{part}}$  is the number of bacteria in the field of view,  $S(q)$  is the structure  
 379 factor of the bacterial fluid and  $F(q)$  is a form factor describing the shape of the bacteria. As can be  
 380 seen in Supplementary Fig. 2a,  $a_1(q)/\langle I \rangle^2$  has a single maximum for each  $\text{OD}_{600}$ . This maximum was  
 381 found to obey the equation  $a_1^{\text{max}}/\langle I \rangle^2 = 1.25 m \text{OD}_{600}/(1 + m \text{OD}_{600})$  (Supplementary Fig. 2b), where  $m$   
 382 is a constant depending on the length of the bacteria and the height of the channel, for channel heights  
 383  $h = 50 \mu\text{m}$  and  $h = 30 \mu\text{m}$ . In the channel height  $h = 8 \mu\text{m}$ , the data were more scattered due to  
 384 the difficulty of obtaining a truly homogeneous suspension even in absence of gradient, and the equation  
 385  $a_1^{\text{max}}/\langle I \rangle^2 = d_0 m \text{OD}_{600}/(1 + m \text{OD}_{600})$ , with  $d_0$  also depending on cell length, was found to better fit

386 the data (Supplementary Fig. 2c). In all experiments, we then used  $a_1^{\max}/\langle I \rangle^2$  obtained from the DDM  
387 measurement to evaluate the local OD<sub>600</sub> via the appropriate equation.

388 The correspondance between optical density and cell body volume fraction was determined by counting  
389 cells in suspensions of known OD<sub>600</sub> flowing at 17.5 μL/min in a flow cytometer (BD Fortessa), which led  
390 to a size-dependent correspondance between cell number density ( $n_c$ ) and OD<sub>600</sub>. The average length  $L$   
391 of the cells was evaluated by segmenting and fitting as ellipses phase contrast microscopy images of the  
392 cells (magnification ×40, NA 0.95) using ImageJ (Rasband, W.S., ImageJ, U. S. National Institutes of  
393 Health, Bethesda, Maryland, USA, <http://imagej.nih.gov/ij/>, 1997-2016.). The cell body volume fraction  
394 was then  $\Phi_c = \pi r^2 L n_c$ , where  $r = 0.5 \mu\text{m}$  is the radius of an *E. coli* cell. The volume fraction was found to  
395 be proportional to optical density for both cell sizes,  $\Phi_c = (1.78 \pm 0.03) 10^{-3} \text{OD}_{600}$  (Supplementary Fig.  
396 2d), yielding the local  $\Phi_c$  for all experiments.

## 397 Calibrations of the swimming speed measurement

398 **Confinement effect compensation** – Classical fits of the intermediate scattering function [46] assume  
399 that the cells are swimming in 3D with equal probability in all directions. Biased swimming directions in  
400 the plane of the field of view were also shown to not affect the measurement as long as the swimming speed  
401 of the cells is the same in all directions [49] (in other words, if chemotaxis, but not chemokinesis, biases  
402 swimming). If the distribution of swimming directions is however biased in the direction perpendicular  
403 to the field of view ( $z$ ), the measured velocity *will* be systematically biased. This was notably the case  
404 when the suspension gets confined towards two dimensions, in the  $h = 30$  and  $8 \mu\text{m}$  channels. Analytical  
405 predictions exist for the DICF both for the 3D and 2D cases, but intermediate situations are more complex;  
406 The 3D analytical expression was thus used to extract the velocity and corrected as follows.

407 Since cells are partially confined in the  $z$  direction, we expect that the swimming speed  $v_0$  measured  
408 using the formula, valid for cells swimming isotropically in three dimensions [46]:

$$f(q, \tau) = e^{-Dq^2\tau} \left( 1 - \alpha + \alpha \left( \frac{Z+1}{Zqv_0\tau} \right) \frac{\sin(Z^{-1} \tan^{-1} \lambda)}{(1+\lambda^2)^{Z/2}} \right), \quad (8)$$

409 with  $\sigma_v = v_0/\sqrt{Z+1}$  and  $\lambda = qv_0\tau/(Z+1)$ , will be systematically biased compared to the real velocity. To  
410 evaluate this bias, the following experiment was conducted. The PDMS chips with  $50 \mu\text{m}$  and  $30 \mu\text{m}$  height  
411 were bound by plasma treatment facing each other and to a glass slide (Supplementary Fig. 11a). Cell  
412 suspensions at  $\text{OD}_{600} \simeq 1$  were flown in the chamber – without a gradient created – and let to equilibrate  
413 for one hour. The motion of the bacteria was recorded successively in the two channels of different heights  
414 and the effective swimming speed  $v_0$  was extracted using equations 7 and 8 for both channels. The ratio  
415  $v_0(30)/v_0(50)$  was found to be  $1.075 \pm 0.01$  (SD –  $N = 10$  repeats). The ratio being higher than 1 was  
416 expected since confinement makes the horizontal runs more probable and therefore increases the apparent  
417 3D velocity. The same game played on the  $h = 8 \mu\text{m}$  channel lead to a ratio  $v_0(8)/v_0(50) = 1.14 \pm 0.02$   
418 (SD –  $N = 5$  repeats). All effective velocities obtained by 3D fitting in both devices of lower heights were  
419 divided by the corresponding factor to deduce the real swimming speed.

420 **Effect of cell length** – The formula 7 is valid only in the case of bacteria with isotropic shapes or for  
421 which the orientation of the anisotropic shape is uncorrelated with the direction of motion. This is a good  
422 approximation in the case of  $2 \mu\text{m}$  long cells observed in phase contrast at  $10\times$  magnification, but not  
423 anymore for  $4 \mu\text{m}$  long cells in these conditions. For anisotropic objects like rods, equation 7 becomes, in

424 the non interacting case:

$$g(q, \tau) = a_0(q) + \langle I^2 \rangle S(q) \int_0^{2\pi} \langle F(q, \theta) f(q, \theta, v\tau) \rangle d\theta \quad (9)$$

425 were  $\theta$  measures the orientation of the rods. Only when  $q$  becomes smaller than  $1/a$ ,  $a$  being the largest  
 426 size of the objects, does  $F(q, \theta) \rightarrow 1$ , and  $g(q, \tau)$  can be fitted as in Wilson *et al.*[46] (Eqs. 8 and 7)  
 427 irrespective of the shape of the particles. The outcome  $v_0(q)$  of the fit of the DICF is plotted for randomly  
 428 chosen experiments with non-treated and elongated cells in Supplementary Fig. 11b. For elongated cells,  
 429 above  $q = 0.9 \text{ px}^{-1}$ , the fitted  $v_0$  decreased because of the anisotropy. We therefore used the values of  $v_0$   
 430 in the range  $q = 0.4 - 0.9 \text{ px}^{-1}$  to evaluate the swimming speed in the case of elongated cells, whereas  
 431  $q = 0.4 - 2.0 \text{ px}^{-1}$  was used for the normal cells.

## 432 Simulations

433 We performed agent-based simulations of the rod-like – length  $L$ , width  $e$  – chemotactic particles in two  
 434 dimensions in a  $256 \times 256 \mu\text{m}^2$  box with periodic boundary conditions. The particles are self-propelled in  
 435 an overdamped fluid at constant propulsion force and interacted by exerting forces and torques on each  
 436 other in the form of a Hertzian repulsion  $\mathbf{F}_{ij}^{\text{el}}$ , a friction  $\mathbf{F}_{ij}^{\text{fr}}$  and far-field hydrodynamic interactions, which  
 437 we accounted for following Jeckel *et al.* [8]. We write  $\mathbf{F}_{ij}^{\text{tot}} = \mathbf{F}_{ij}^{\text{el}} + \mathbf{F}_{ij}^{\text{fr}}$  the sum of the elastic repulsion and  
 438 friction generated upon contact by particle  $j$  on  $i$ :

$$\mathbf{F}_{ij}^{\text{el}} = K_{\text{el}} \delta_{i,j}^{3/2} \mathbf{u}_{ij}, \quad (10)$$

$$\mathbf{F}_{ij}^{\text{fr}} = -K_{\text{fr}}(\mathbf{v}_i - \mathbf{v}_j) \cdot \mathbf{v}_{ij} \mathbf{v}_{ij}, \quad (11)$$

440 with  $\mathbf{u}_{ij}$  and  $\mathbf{v}_{ij}$  the normalized orthogonal vectors defined in the inset of Fig. 4a,  $\delta_{i,j}$  the inter-penetration  
 441 depth between particle  $i$  and  $j$ . The free running velocity of particle  $i$  is  $\mathbf{v}_i = v_i \mathbf{n}_i$ , with a norm  $v_i$  chosen  
 442 randomly in a Gaussian distribution of mean  $v_0$  and variance  $dv_0$  and direction  $\mathbf{n}_i = (\cos(\theta_i), \sin(\theta_i))$ . Note  
 443 that  $\mathbf{F}^{\text{fr}}$ , which was not included in previous studies [22–24], could be interpreted as effectively resulting  
 444 from short-range cell-cell interactions including viscous shear in the thin liquid film between two cells,  
 445 complex flagellar entanglement, and solid friction. The particles can be in two states, either running  
 446 ( $\Theta_i = 1$ ) or tumbling ( $\Theta_i = 0$ ). During tumbles, self-propulsion is switched off and a random torque  
 447 made the particle turn, with an average magnitude chosen to match literature reported turning angle  
 448 distributions [74]. The equations of motion for their position  $\mathbf{r}_i$  and orientation  $\theta_i$  are therefore:

$$\frac{d\mathbf{r}_i}{dt} = \Theta_i v_i \mathbf{n}_i + \Sigma_j \frac{\mathbf{w}_j(\mathbf{r}_i) + \mathbf{w}_j(\mathbf{r}_i - L_{\text{dip}} \mathbf{n}_i)}{2} + (\gamma_{\perp}^{-1} \mathbf{I} + (\gamma_{\parallel}^{-1} - \gamma_{\perp}^{-1}) \mathbf{n}_i \mathbf{n}_i) \Sigma_j \mathbf{F}_{ij}^{\text{tot}} \quad (12)$$

$$\frac{d\theta_i}{dt} = \sqrt{D_r} \eta_r(t) + \sqrt{D_T} \eta_T(t) (1 - \Theta_i) + \mathbf{n}_i \wedge \Sigma_j \left( \frac{\mathbf{w}_j(\mathbf{r}_i) - \mathbf{w}_j(\mathbf{r}_i - L_{\text{dip}} \mathbf{n}_i)}{L_{\text{dip}}} + \gamma_r^{-1} l_{i,j} \mathbf{F}_{ij}^{\text{tot}} \right). \quad (13)$$

449 The translational friction coefficients read  $\gamma_{\parallel} = 2\pi\eta L / \ln(L/e)$  and  $\gamma_{\perp} = 2\gamma_{\parallel}$ , and  $\gamma_r = \gamma_{\parallel} L^2 / 6$  is the  
 450 rotational friction coefficient. The distance between the center of mass of the particle and the contact point  
 451 with particle  $j$  is  $l_{i,j}$ . Rotational Brownian motion is modelled using the rotational diffusion coefficient  $D_r$   
 452 and the normal Gaussian noise  $\eta_r(t)$ , and reorientation during tumbles using corresponding  $D_T$  and  $\eta_T(t)$ .

453 When hydrodynamic interactions are included,  $\mathbf{w}_j(\mathbf{r})$  is the flow generated by particle  $j$  at point  $\mathbf{r}$ .  
 454 The particles thus react to external flows as a dumbbell. As a source of flow, they are modeled as a dipole

455 of point forces of pusher symmetry (Fig. 4a). The point of application of the resistive force coincides with  
 456 the center of the rod, the one of the propulsive force being situated  $L_{\text{dip}} = L/2 + L_{\text{flag}}/2$  behind the latter  
 457 in the direction of the rod. Following Jeckel *et al.* [8], we used a quasi-2D approximation to compute the  
 458 flow generated by the 2D point force  $\mathbf{F} = \gamma_{\parallel} v_j \mathbf{n}_j$ . The fluid velocity  $\mathbf{u}$  is assumed to take a Poiseuille  
 459 profile in the z-direction, its average (x,y)-component  $\mathbf{U} = 1/h \int_0^h \mathbf{u}(x, y, z) dz$  thus obeying an effective 2D  
 460 Hele-Shaw equation:

$$\nabla \cdot \mathbf{U} = 0 \quad (14)$$

$$\nabla P - \eta(\nabla^2 \mathbf{U} - \kappa \mathbf{U}) = \frac{\mathbf{F}}{h} \delta^{(2)}(\mathbf{r}) \quad (15)$$

462 where  $P$  is the pressure,  $\nabla = (\partial_x, \partial_y)$  and  $\kappa = 12/h^2$ , the origin being taken at the point of application of  
 463  $\mathbf{F}$ . This equation was solved in Jeckel *et al.* [8]:

$$\mathbf{U} = \mathbf{G} \cdot \mathbf{F} \quad (16)$$

464 with the symmetric matrix:

$$\mathbf{G} = \frac{1}{\pi \eta h \kappa |r|^2} [c_1(\sqrt{\kappa}|r|)\mathbf{I} + c_2(\sqrt{\kappa}|r|)\hat{\mathbf{r}}\hat{\mathbf{r}}] \quad (17)$$

465 where  $\hat{\mathbf{r}} = \mathbf{r}/|r|$  and the factors:

$$c_1(z) = z^2 [K_0(z) + K_2(z)] / 2 - 1 \quad (18)$$

$$c_2(z) = 2 - z^2 K_2(z) \quad (19)$$

467 where  $K_n$  are modified Bessel functions of the second kind. The flow generated by particle  $j$  at a position  
 468  $\mathbf{r}$  from the center of the rod is then:

$$\mathbf{w}_j(\mathbf{r}) = \mathbf{U}(\mathbf{F}_j, \mathbf{r}) + \mathbf{U}(-\mathbf{F}_j, \mathbf{r} + L_{\text{dip}}\mathbf{n}_j) \quad (20)$$

469 which we compute as such in the algorithm, because the dipole approximation do not model short range  
 470 flows accurately enough for our simulations. Note that the range of the interaction is set by the height of  
 471 the channel via  $\kappa$ . Interestingly, the term  $\eta\kappa\mathbf{U}$  which introduces this scaling in Eq. 15 comes from a term  
 472 of friction on the wall ( $-\eta(\partial_z \mathbf{u}(h) - \partial_z \mathbf{u}(0))$ ) which appears when averaging the 3D Stokes equation over  
 473 the channel height. The fluid flow is plotted for the three channel heights we used in Supplementary Fig.  
 474 6a. When the height increases, the flow field goes from circular flow patterns to a pattern qualitatively  
 475 more akin to 3D dipoles (although quantitatively different).

476 Finally, the state of each particle ( $\Theta_i$ ) was determined by an internal chemotaxis system evolving  
 477 according to the ligand concentration experienced by the cells, first formulated in Vladimirov *et al.* [59],  
 478 with the only difference that the instantaneous tumble probability was set directly using the concentration  
 479 of phosphorylated CheY (CheY-P), disregarding the existence of multiple flagellar motors. This model is  
 480 detailed in Supplementary Note 2.

481 The set of equations 10-13, 16-20 and Supplementary Eqs. 1-8, which governs the position and orien-  
 482 tation of the rods, was solved by Euler integration. Parameter values [59, 75] are given in Supplementary  
 483 Table S2.

## 484 Data availability

485 The data supporting the findings of this study, including raw images and movies, are available upon request  
 486 from the corresponding authors.



## 487 Code availability

488 The source codes of the image analysis methods are available at <https://github.com/croelmiyn/FourierImageAnalysis>  
489 under MIT Licence and can be accessed and cited using <https://dx.doi.org/10.5281/zenodo.3516258>. The  
490 code of the simulations is available at <https://github.com/croelmiyn/SimulationsChemotaxis> under MIT  
491 Licence. The source code can be accessed and cited using <https://dx.doi.org/10.5281/zenodo.3516624>. All  
492 codes were written in Java v1.8.0 and implemented in the form of Plugins for ImageJ v1.49.

## 493 Acknowledgements

494 The authors thank Pr. W. Stolz, M. Koch and K. Volz for access to the microfabrication facility at the  
495 Center for Material Science (Philipps-Universität Marburg), Dr. L. Laganenka for providing the  $\Delta flu$   
496 mutant and H. Jeckel for assistance with the hydrodynamic simulations. This work was supported by  
497 grant 294761-MicRobE from the European Research Council.

## 498 Author contributions

499 R.C. and V.S. designed the research, R.C. performed and analyzed the experiments and simulations, K.D.  
500 contributed to simulations, R.C., K.D. and V.S. wrote the manuscript.

## 501 References

- 502 [1] Dombrowski, C., Cisneros, L., Chatkaew, S., Goldstein, R. E. & Kessler, J. O. Self-concentration and  
503 large-scale coherence in bacterial dynamics. *Phys. Rev. Lett.* **93**, 098103 (2004).
- 504 [2] Sokolov, A., Aranson, I. S., Kessler, J. O. & Goldstein, R. E. Concentration dependence of the  
505 collective dynamics of swimming bacteria. *Phys. Rev. Lett.* **98**, 158102 (2007).
- 506 [3] Marchetti, M. C. *et al.* Hydrodynamics of soft active matter. *Rev. Mod. Phys.* **85** (2013).
- 507 [4] Kearns, D. B. A field guide to bacterial swarming motility. *Nat. Rev. Microbiol.* **8**, 634–644 (2010).
- 508 [5] Darnton, N. C., Turner, L., Rojevsky, S. & Berg, H. C. Dynamics of bacterial swarming. *Biophys. J.*  
509 **98**, 2082–2090 (2010).
- 510 [6] Chen, C., Liu, S., Shi, X.-q., Chaté, H. & Wu, Y. Weak synchronization and large-scale collective  
511 oscillation in dense bacterial suspensions. *Nature* **542**, 210 – 214 (2017).
- 512 [7] Ilkanaiv, B., Kearns, D. B., Ariel, G. & Be'er, A. Effect of cell aspect ratio on swarming bacteria.  
513 *Phys. Rev. Lett.* **118**, 158002 (2017).
- 514 [8] Jeckel, H. *et al.* Learning the space-time phase diagram of bacterial swarm expansion. *Proc. Natl*  
515 *Acad. Sci. USA* **116**, 1489–1494 (2019).
- 516 [9] Stickler, D. & Hughes, G. Ability of *Proteus mirabilis* to swarm over urethral catheters. *Eur. J. Clin.*  
517 *Microbiol. Infect. Dis.* **18**, 206–8 (1999).
- 518 [10] Ardre, M., Henry, H., Douarche, C. & Plapp, M. An individual-based model for biofilm formation at  
519 liquid surfaces. *Phys. Biol.* **12**, 066015 (2015).

- 520 [11] Sokolov, A. & Aranson, I. S. Physical properties of collective motion in suspensions of bacteria. *Phys.*  
521 *Rev. Lett.* **109**, 248109 (2012).
- 522 [12] Dunkel, J. *et al.* Fluid dynamics of bacterial turbulence. *Phys. Rev. Lett.* **110**, 228102 (2013).
- 523 [13] Gachelin, J., Rousselet, A., Lindner, A. & Clement, E. Collective motion in an active suspension of  
524 *Escherichia coli* bacteria. *New J. Phys.* **16**, 025003 (2014).
- 525 [14] Lushi, E., Wioland, H. & Goldstein, R. E. Fluid flows created by swimming bacteria drive self-  
526 organization in confined suspensions. *Proc. Natl Acad. Sci. USA* **111**, 9733–9738 (2014).
- 527 [15] Saintillan, D. & Shelley, M. J. Instabilities, pattern formation, and mixing in active suspensions. *Phys.*  
528 *Fluids* **20**, 123304 (2008).
- 529 [16] Wolgemuth, C. W. Collective swimming and the dynamics of bacterial turbulence. *Biophys. J.* **95**,  
530 1564–1574 (2008).
- 531 [17] Baskaran, A. & Marchetti, M. C. Statistical mechanics and hydrodynamics of bacterial suspensions.  
532 *Proc. Natl Acad. Sci. USA* **106**, 15567–15572 (2009).
- 533 [18] Decoene, A., Martin, S. & Maury, B. Microscopic modelling of active bacterial suspensions. *Math.*  
534 *Model. Nat. Phenom.* **6**, 98–129 (2011).
- 535 [19] Subramanian, G., Koch, D. L. & Fitzgibbon, S. R. The stability of a homogeneous suspension of  
536 chemotactic bacteria. *Phys. Fluids* **23**, 041901 (2011).
- 537 [20] Wensink, H. H. *et al.* Meso-scale turbulence in living fluids. *Proc. Natl Acad. Sci. USA* **109**, 14308–  
538 14313 (2012).
- 539 [21] Vicsek, T., Czirok, A., Ben-Jacob, E., Cohen, I. I. & Shochet, O. Novel type of phase transition in a  
540 system of self-driven particles. *Phys. Rev. Lett.* **75**, 1226–1229 (1995).
- 541 [22] Ginelli, F., Peruani, F., Bar, M. & Chate, H. Large-scale collective properties of self-propelled rods.  
542 *Phys. Rev. Lett.* **104**, 184502 (2010).
- 543 [23] Wensink, H. H. & Lowen, H. Emergent states in dense systems of active rods: from swarming to  
544 turbulence. *J. Phys. Condens. Matter* **24**, 464130 (2012).
- 545 [24] Abkenar, M., Marx, K., Auth, T. & Gompper, G. Collective behavior of penetrable self-propelled rods  
546 in two dimensions. *Phys. Rev. E* **88**, 062314 (2013).
- 547 [25] Liao, Q., Subramanian, G., DeLisa, M. P., Koch, D. L. & Wu, M. M. Pair velocity correlations among  
548 swimming *Escherichia coli* bacteria are determined by force-quadrupole hydrodynamic interactions.  
549 *Phys. Fluids* **19**, 061701 (2007).
- 550 [26] Drescher, K., Dunkel, J., Cisneros, L. H., Ganguly, S. & Goldstein, R. E. Fluid dynamics and noise  
551 in bacterial cell-cell and cell-surface scattering. *Proc. Natl Acad. Sci. USA* **108**, 10940–10945 (2011).
- 552 [27] Ezhilan, B., Shelley, M. J. & Saintillan, D. Instabilities and nonlinear dynamics of concentrated active  
553 suspensions. *Phys. Fluids* **25**, 070607 (2013).
- 554 [28] Berg, H. C. *Random Walks in Biology* (Princeton University Press, Princeton, NJ, 1983).

- 555 [29] Colin, R. & Sourjik, V. Emergent properties of bacterial chemotaxis pathway. *Curr. Opin. Microbiol.*  
556 **39**, 24–33 (2017).
- 557 [30] Sourjik, V. & Wingreen, N. S. Responding to chemical gradients: bacterial chemotaxis. *Curr. Opin.*  
558 *Cell Biol.* **24**, 262–268 (2012).
- 559 [31] Tu, Y. Quantitative modeling of bacterial chemotaxis: signal amplification and accurate adaptation.  
560 *Annu. Rev. Biophys.* **42**, 337–59 (2013).
- 561 [32] Larsen, S. H., Reader, R. W., Kort, E. N., Tso, W. W. & Adler, J. Change in direction of flagellar  
562 rotation is basis of chemotactic response in *Escherichia coli*. *Nature* **249**, 74–77 (1974).
- 563 [33] Stock, J. B., Ninfa, A. J. & Stock, A. M. Protein phosphorylation and regulation of adaptive responses  
564 in bacteria. *Microbiol. Rev.* **53**, 450–490 (1989).
- 565 [34] Goy, M. F., Springer, M. S. & Adler, J. Sensory transduction in *Escherichia coli* - role of a protein  
566 methylation reaction in sensory adaptation. *Proc. Natl Acad. Sci. USA* **74**, 4964–4968 (1977).
- 567 [35] Yi, T. M., Huang, Y., Simon, M. I. & Doyle, J. Robust perfect adaptation in bacterial chemotaxis  
568 through integral feedback control. *Proc. Natl Acad. Sci. USA* **97**, 4649–4653 (2000).
- 569 [36] Segall, J. E., Block, S. M. & Berg, H. C. Temporal comparisons in bacterial chemotaxis. *Proc. Natl*  
570 *Acad. Sci. USA* **83**, 8987–8991 (1986).
- 571 [37] Park, H. *et al.* Interdependence of behavioural variability and response to small stimuli in bacteria.  
572 *Nature* **468**, 819–U114 (2010).
- 573 [38] Laganenka, L., Colin, R. & Sourjik, V. Chemotaxis towards autoinducer 2 mediates autoaggregation  
574 in *Escherichia coli*. *Nat. Commun.* **7**, 12984 (2016).
- 575 [39] Jani, S., Seely, A. L., Peabody, V. G., Jayaraman, A. & Manson, M. D. Chemotaxis to self-generated  
576 AI-2 promotes biofilm formation in *Escherichia coli*. *Microbiol.* **163**, 1778–1790 (2017).
- 577 [40] Budrene, E. O. & Berg, H. C. Dynamics of formation of symmetrical patterns by chemotactic bacteria.  
578 *Nature* **376**, 49–53 (1995).
- 579 [41] Park, S. *et al.* Influence of topology on bacterial social interaction. *Proc. Natl Acad. Sci. USA* **100**,  
580 13910–13915 (2003).
- 581 [42] Saragosti, J. *et al.* Directional persistence of chemotactic bacteria in a traveling concentration wave.  
582 *Proc. Natl Acad. Sci. USA* **108**, 16235–16240 (2011).
- 583 [43] Fu, X. *et al.* Spatial self-organization resolves conflicts between individuality and collective migration.  
584 *Nat. Commun.* **9**, 2177 (2018).
- 585 [44] Anyan, M. E. *et al.* Type IV pili interactions promote intercellular association and moderate swarming  
586 of *Pseudomonas aeruginosa*. *Proc. Natl Acad. Sci. USA* **111**, 18013–18018 (2014).
- 587 [45] Lushi, E., Goldstein, R. E. & Shelley, M. J. Collective chemotactic dynamics in the presence of  
588 self-generated fluid flows. *Phys. Rev. E* **86**, 040902 (2012).

- 589 [46] Wilson, L. G. *et al.* Differential dynamic microscopy of bacterial motility. *Phys. Rev. Lett.* **106**, 018101  
590 (2011).
- 591 [47] Martinez, V. A. *et al.* Differential dynamic microscopy: A high-throughput method for characterizing  
592 the motility of microorganisms. *Biophys. J.* **103**, 1637–1647 (2012).
- 593 [48] Giavazzi, F. & Cerbino, R. Digital Fourier microscopy for soft matter dynamics. *J. Opt.* **16**, 083001  
594 (2014).
- 595 [49] Colin, R., Zhang, R. & Wilson, L. G. Fast, high-throughput measurement of collective behaviour in  
596 a bacterial population. *J. Royal Soc. Interface* **11**, 0486 (2014).
- 597 [50] Kim, M. J. & Breuer, K. S. Enhanced diffusion due to motile bacteria. *Phys. Fluids* **16**, L78–L81  
598 (2004).
- 599 [51] Dufour, Y. S., Fu, X., Hernandez-Nunez, L. & Emonet, T. Limits of feedback control in bacterial  
600 chemotaxis. *PLOS Comput. Biol.* **10**, e1003694 (2014).
- 601 [52] Celani, A., Shimizu, T. S. & Vergassola, M. Molecular and functional aspects of bacterial chemotaxis.  
602 *J. Stat. Phys.* **144**, 219–240 (2011).
- 603 [53] Si, G., Wu, T., Ouyang, Q. & Tu, Y. Pathway-based mean-field model for *Escherichia coli* chemotaxis.  
604 *Phys. Rev. Lett.* **109**, 048101 (2012).
- 605 [54] Long, J., Zucker, S. & Emonet, T. Feedback between motion and sensation provides nonlinear boost  
606 in run-and-tumble navigation. *PLOS Comput. Biol.* **13**, e1005429 (2017).
- 607 [55] Schauer, O. *et al.* Motility and chemotaxis of bacteria-driven microswimmers fabricated using antigen  
608 43-mediated biotin display. *Sci. Rep.* **8**, 9801 (2018).
- 609 [56] Vladimirov, N., Lebedez, D. & Sourjik, V. Predicted auxiliary navigation mechanism of peritrichously  
610 flagellated chemotactic bacteria. *PLOS Comput. Biol.* **6**, e1000717 (2010).
- 611 [57] Hu, B. & Tu, Y. Behaviors and strategies of bacterial navigation in chemical and nonchemical gradi-  
612 ents. *PLOS Comput. Biol.* **10**, e1003672 (2014).
- 613 [58] Ariel, G. *et al.* Collective dynamics of two-dimensional swimming bacteria: Experiments and models.  
614 *Phys. Rev. E* **98**, 032415 (2018).
- 615 [59] Vladimirov, N., Lovdok, L., Lebedez, D. & Sourjik, V. Dependence of bacterial chemotaxis on gradient  
616 shape and adaptation rate. *PLOS Comput. Biol.* **4**, e1000242 (2008).
- 617 [60] Burkart, M., Toguchi, A. & Harshey, R. M. The chemotaxis system, but not chemotaxis, is essential  
618 for swarming motility in *Escherichia coli*. *Proc. Natl Acad. Sci. USA* **95**, 2568–2573 (1998).
- 619 [61] Mariconda, S., Wang, Q. F. & Harshey, R. M. A mechanical role for the chemotaxis system in  
620 swarming motility. *Mol. Microbiol.* **60**, 1590–1602 (2006).
- 621 [62] Stenhammar, J., Nardini, C., Nash, R. W., Marenduzzo, D. & Morozov, A. Role of correlations in  
622 the collective behavior of microswimmer suspensions. *Phys. Rev. Lett.* **119**, 028005 (2017).

- 623 [63] Krishnamurthy, D. & Subramanian, G. Collective motion in a suspension of micro-swimmers that  
624 run-and-tumble and rotary diffuse. *J. Fluid Mech.* **781**, 422–466 (2015).
- 625 [64] Segre, P. N., Herbolzheimer, E. & Chaikin, P. M. Long-range correlations in sedimentation. *Phys.*  
626 *Rev. Lett.* **79**, 2574–2577 (1997).
- 627 [65] Tee, S. Y. *et al.* Nonuniversal velocity fluctuations of sedimenting particles. *Phys. Rev. Lett.* **89**,  
628 054501 (2002).
- 629 [66] Lauga, E., DiLuzio, W. R., Whitesides, G. M. & Stone, H. A. Swimming in circles: Motion of bacteria  
630 near solid boundaries. *Biophys. J.* **90**, 400–412 (2006).
- 631 [67] Sosa-Hernandez, J. E., Santillan, M. & Santana-Solano, J. Motility of *Escherichia coli* in a quasi-two-  
632 dimensional porous medium. *Phys. Rev. E* **95**, 032404 (2017).
- 633 [68] Croze, O. A., Ferguson, G. P., Cates, M. E. & Poon, W. C. K. Migration of chemotactic bacteria in  
634 soft agar: Role of gel concentration. *Biophys. J.* **101**, 525–534 (2011).
- 635 [69] Elgeti, J., Winkler, R. G. & Gompper, G. Physics of microswimmers-single particle motion and  
636 collective behavior: a review. *Rep. Prog. Phys.* **78**, 056601 (2015).
- 637 [70] Abe, T., Nakamura, S. & Kudo, S. Bioconvection induced by bacterial chemotaxis in a capillary assay.  
638 *Biochem. Biophys. Res. Commun.* **483**, 277–282 (2017).
- 639 [71] Adler, J. Method for measuring chemotaxis and use of method to determine optimum conditions for  
640 chemotaxis by *Escherichia coli*. *J. Gen. Microbiol.* **74**, 77–91 (1973).
- 641 [72] Turner, L., Zhang, R. J., Darnton, N. C. & Berg, H. C. Visualization of flagella during bacterial  
642 swarming. *J. Bacteriol.* **192**, 3259–3267 (2010).
- 643 [73] Swiecicki, J. M., Sliusarenko, O. & Weibel, D. B. From swimming to swarming: *Escherichia coli* cell  
644 motility in two-dimensions. *Integr. Biol.* **5**, 1490–1494 (2013).
- 645 [74] Taute, K. M., Gude, S., Tans, S. J. & Shimizu, T. S. High-throughput 3D tracking of bacteria on a  
646 standard phase contrast microscope. *Nat. Commun.* **6**, 8776 (2015).
- 647 [75] Yang, Y. L. & Sourjik, V. Opposite responses by different chemoreceptors set a tunable preference  
648 point in *Escherichia coli* pH taxis. *Mol. Microbiol.* **86**, 1482–1489 (2012).



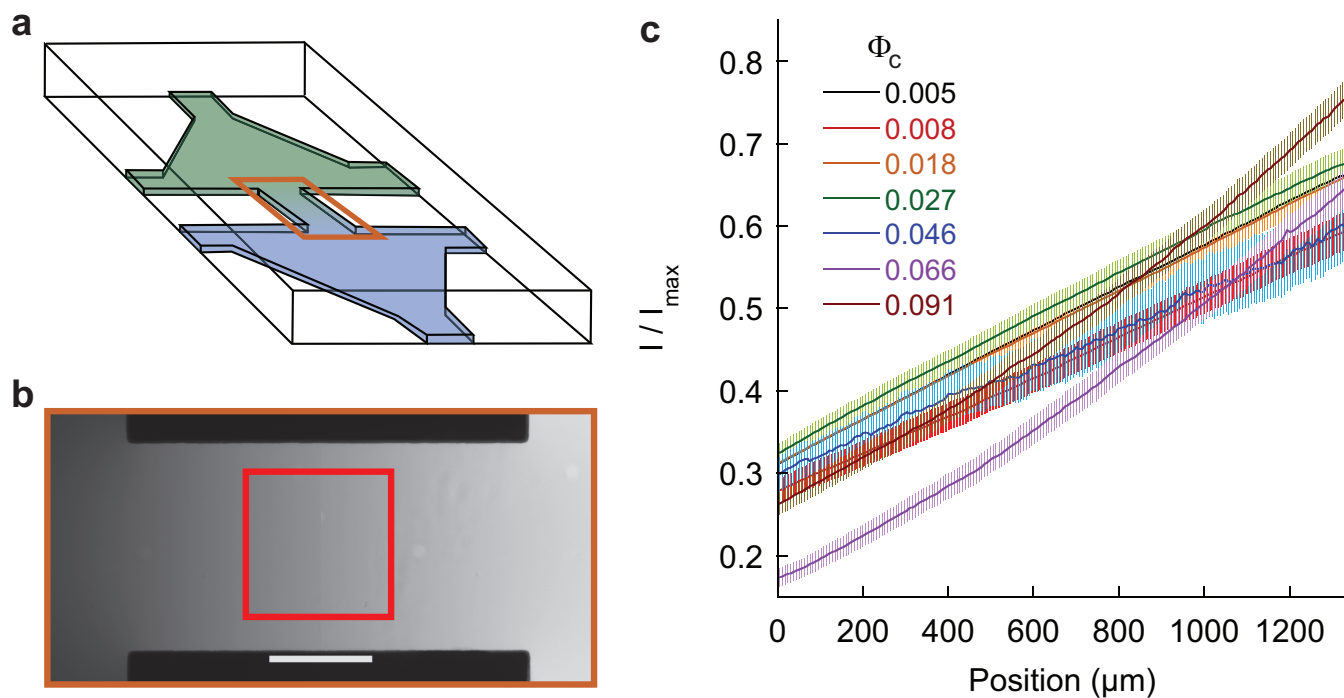

**Fig. 1.** Microfluidic device used for chemotaxis assays. **a**, Schematic representation of the device, where two reservoirs with different chemical composition are connected by a channel in which the chemoattractant gradient forms. **b**, Central part of the device, highlighted orange in **(a)**, with gradient profile across the channel quantified using fluorescein. Scale bar is  $500 \mu\text{m}$ . The red box indicates the location at which cellular behaviour is recorded. **c**, Examples of gradients, measured in the  $h = 50 \mu\text{m}$  device, for cell suspensions of indicated cell densities. Error bars represent measurement error.

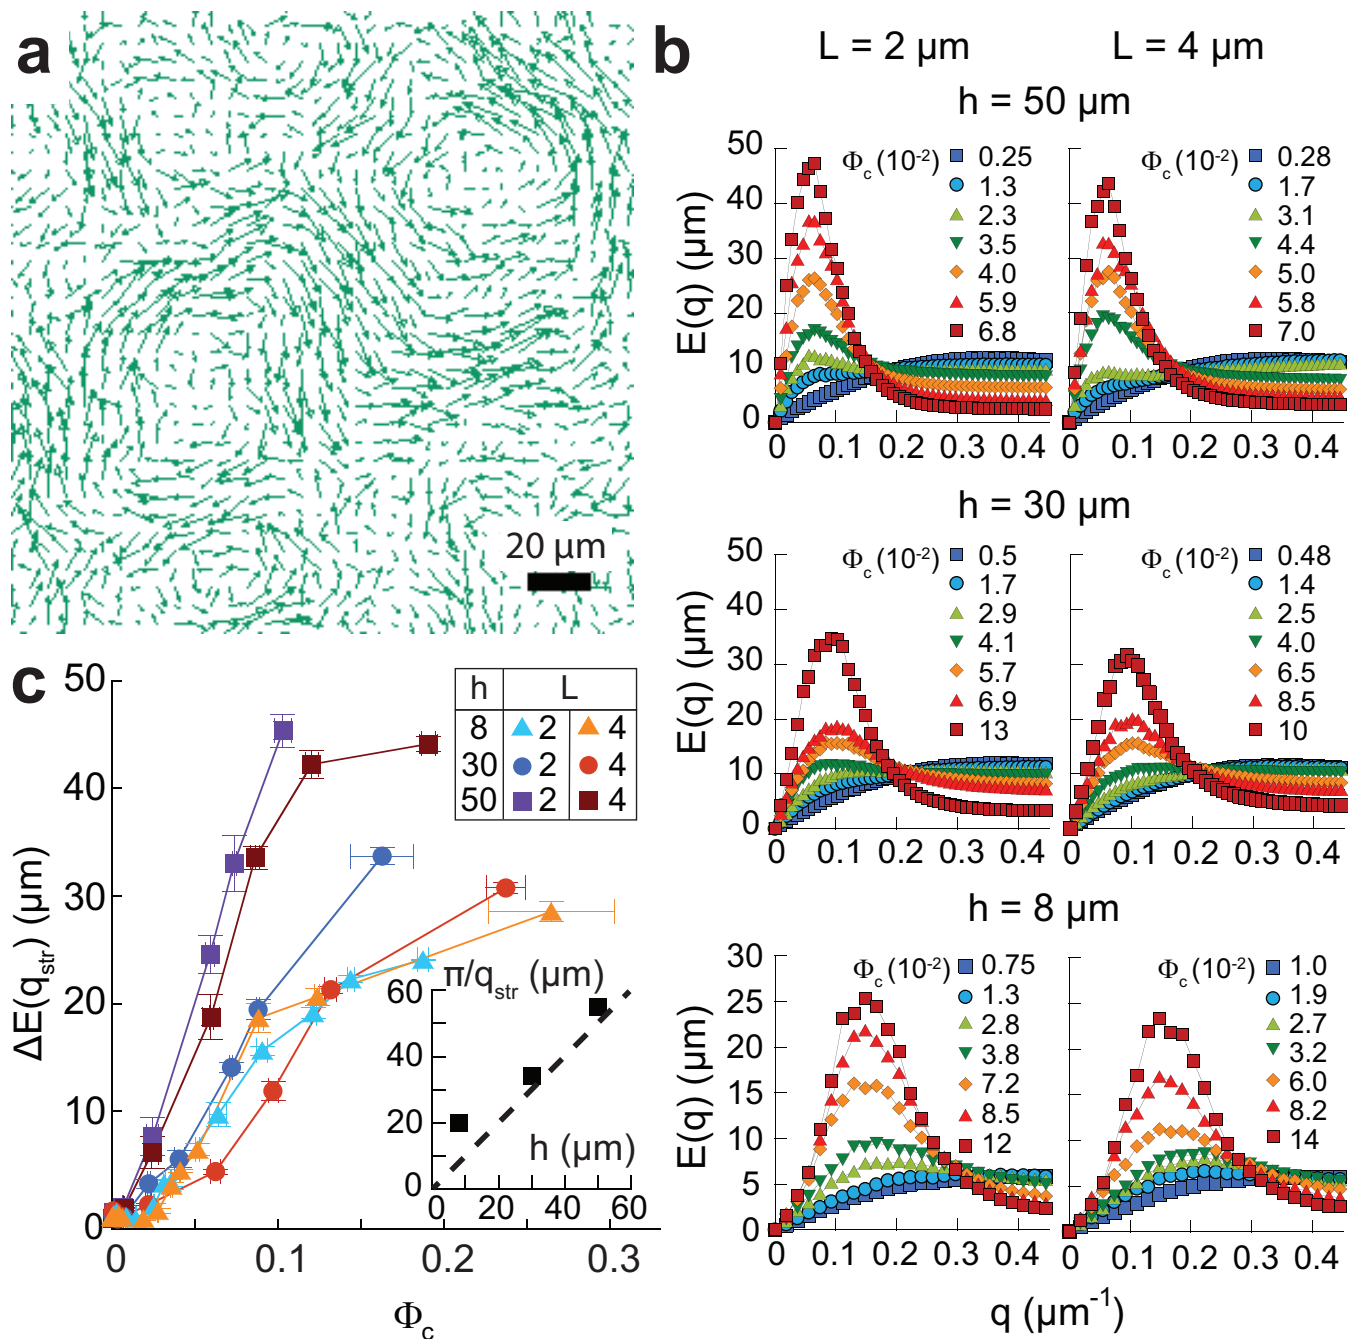

**Fig. 2.** Collective motion in bacterial suspensions. **a**, Typical snapshot of the velocity field measured in a high-density cell suspension ( $\Phi_c = 0.08$ , cell length  $L = 2 \mu\text{m}$ , channel height  $h = 50 \mu\text{m}$ ). **b**, Flow structure factor  $E(q)$  for increasing cell densities at the indicated values of channel height and cell length. **c**, Amplitude of the peak, corrected for the low density value,  $\Delta E(q_{\text{str}})$  as a function of cell density in the different experimental conditions. Each point is the median, and associated error bar the standard error of the mean (SEM) of 8 measurements, binned according to cell density. Inset:  $\pi/q_{\text{str}}$  as a function of channel height. Dashed line indicates equality.

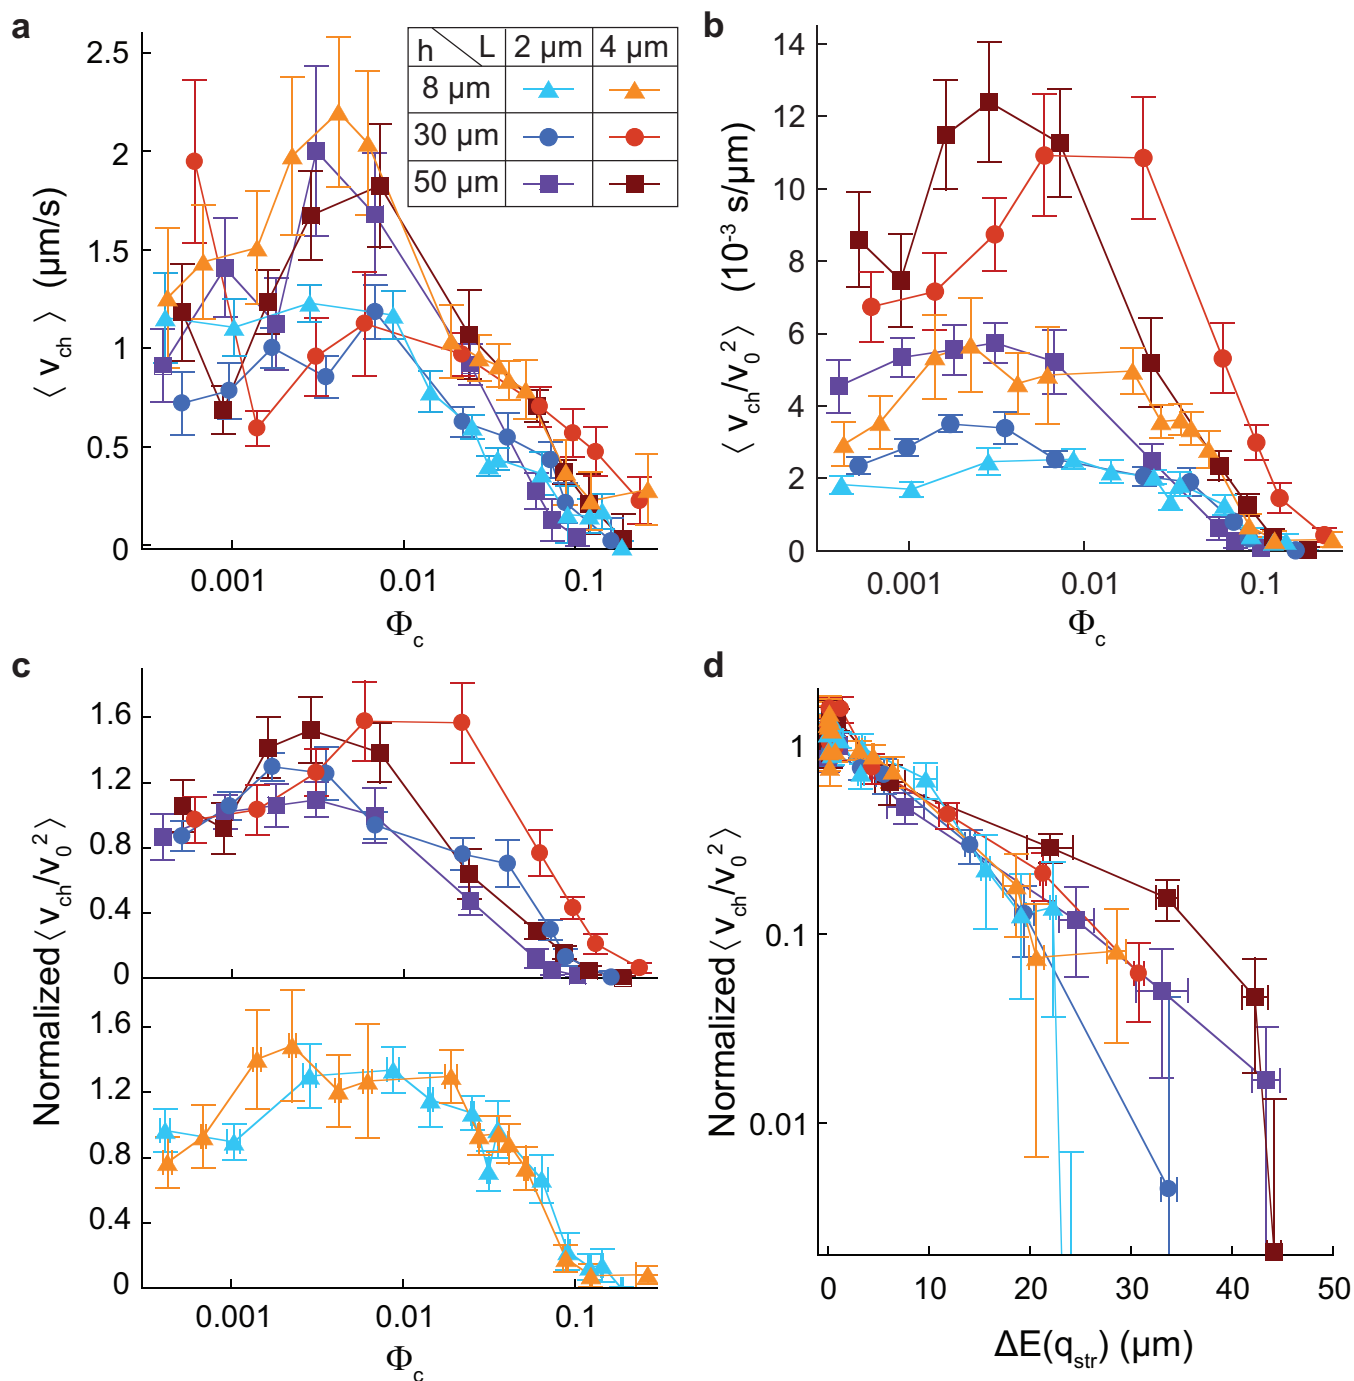

**Fig. 3.** Effect of collective motion on the chemotactic drift. **a**, Chemotactic drift  $v_{ch}$  as a function of cell density for indicated values of cell length ( $L$ ) and channel height ( $h$ ). **b**, Chemotactic coefficient  $v_{ch}/v_0^2$  as a function of cell density. **c–d**, Chemotactic coefficient normalized to its low-density value as a function of cell density (**c**) or of the amplitude  $\Delta E(q_{str})$  of the collective motion (**d**). Labels throughout the figure are defined in panel (**a**). Each point represents the median of 8 experiments. Error bars represent the SEM in abscissa and the sum of the SEM and the mean measurement error in ordinate.

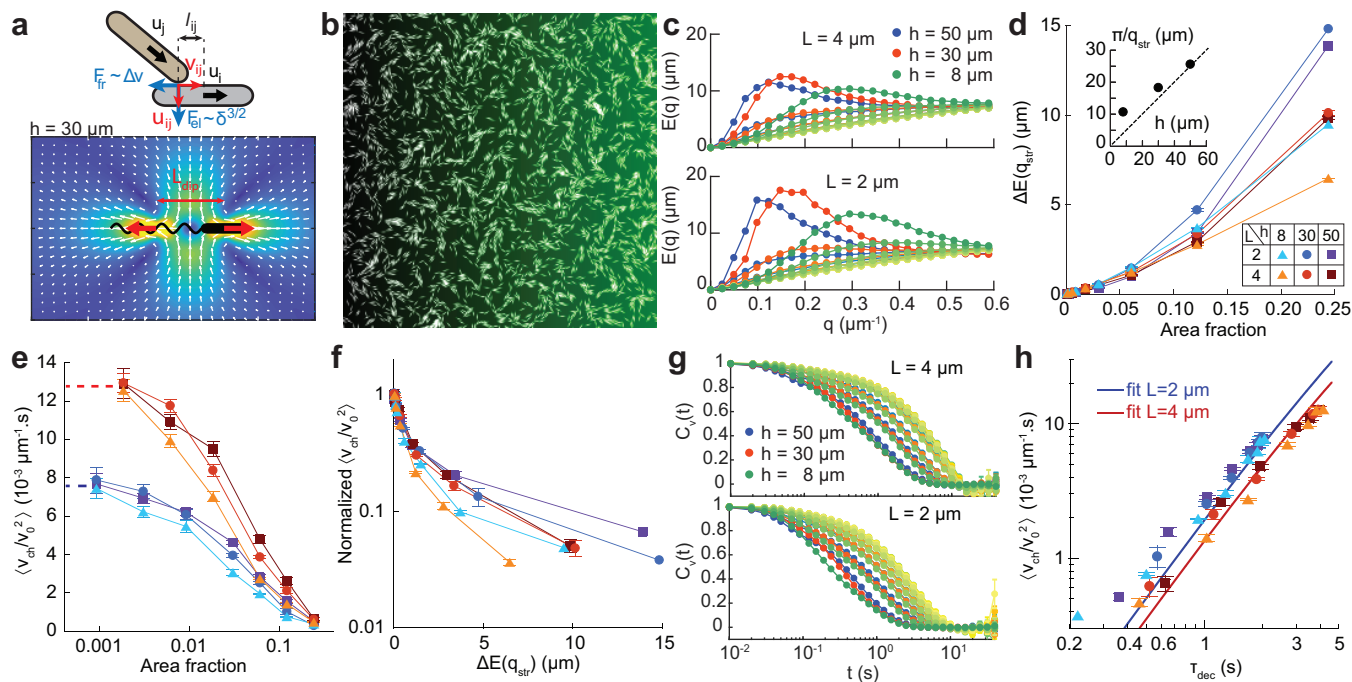

**Fig. 4.** Numerical simulations of self-propelled interacting chemotactic rods in 2D. **a**, Schematic representation of the simulated steric interaction between the rods, where interpenetration ( $\delta$ ) results in Hertzian-like repulsion ( $F_{el}$ ) and friction ( $F_{fr}$ ), and the fluid flow generated by the hydrodynamic force dipole, here for channel height  $h = 30 \mu\text{m}$ . For other heights, see Supplementary Fig. 6. **b**, Snapshot of a simulation output (length  $L = 4 \mu\text{m}$ ,  $h = 30 \mu\text{m}$ ,  $\Phi = 0.244$ ), showing collective motion of packs of rods. The green shading represents the gradient. **c**, Flow structure factor  $E(q)$  for indicated conditions, exhibiting a growing maximum at a  $q_{str}$  depending only on the channel height  $h$ . Darkening shading of a given color indicates increasing area fraction in the range 0.002 – 0.25. **d**, Maximum subtracted of its low density value,  $\Delta E(q_{str})$ , as a function of cell area fraction. (Inset) Typical vortex size  $\pi/q_{str}$  as a function of the channel height. Note the difference in scale compared to Fig. 2c. **e**, Chemotactic coefficient as a function of the cell area fraction. Dotted lines represent its value in absence of interactions. **f**, Chemotactic coefficient, normalized to its low density value, as a function of the maximum of the flow structure factor  $\Delta E(q_{str})$ . **g**, Time autocorrelations of the cells velocity, the color coding is the same as in panel c. **h**, Chemotactic coefficient as a function of the decorrelation time  $\tau_{dec}$ , defined by  $C_v(\tau_{dec}) = 0.5$ , and fit according to Eq. 4. **d-f,h**, Conditions are as indicated in panel d and error bars represent SEM on at least 3 runs, totalizing at least 1000 cells.

649

## Supplementary Information

650

Chemotactic behaviour of *Escherichia coli* at high cell density

651

Colin *et al.*



## 652 Supplementary notes

### 653 Supplementary Note 1. Peclet number

654 The Peclet number compares diffusion and advection of the chemical attractant in the fluid. It is defined as  
655  $Pe = hv_f/D$ , since the typical size of the flow scales with the height of the channel. Here  $v_f$  is the velocity  
656 of the fluid. It can be estimated from the difference between the high density collective velocity and the free  
657 swimming speed assumed by the cell at low density. It never exceeded  $10 \mu\text{m/s}$  (Supplementary Fig. 1).  
658 Taking the maximal  $h = 50 \mu\text{m}$ , and considering that  $D = 500 \mu\text{m}^2/\text{s}$ , leads to  $Pe \leq 1$  for all experiments,  
659 no matter how strong the collective motion is.  $Pe = 1$  indicates that distortions of the gradient are to be  
660 expected, as we observe in the case of the strongest collective motion.

### 661 Supplementary Note 2. Chemotactic drift in shallow gradients

662 **Model of the pathway** – The chemotaxis pathway of *E. coli* is composed of a large superstructure  
663 (array) of coupled receptor dimers, embedded in the inner membrane of the cell, and coassembled with the  
664 cytoplasmic kinase CheA and adaptor protein CheW. The most abundant chemoreceptors of *E. coli* are  
665 Tar (the main sensor of MeAsp) and Tsr. Chemoeffectors bind the receptors on their periplasmic domain,  
666 inducing conformational changes which cooperatively modify the autophosphorylation activity of the kinase  
667 CheA, attractants reducing kinase activity. The cooperative array organization enables to integrate and  
668 amplify signals from different receptors. The kinase then transmits its phosphates to the small diffusible  
669 molecule CheY. Phosphorylated CheY binds to the motor to induce tumbles and is dephosphorylated by  
670 CheZ. The previous reactions are subsecond so that a sudden increase in attractant concentration induces a  
671 fast drop in the probability of tumbling. Two enzymes, CheR and CheB, then respectively add and remove  
672 methyl groups to specific amino-acids of the respectively inactive and active chemoreceptors in few seconds.  
673 This slowly offsets chemoeffectors action, adapting the average kinase activity – and thus the tumbling rate  
674 – back to the intermediate value it assumes in homogeneous environments, so that subsequent stimulations  
675 can be sensed. The current methylation level of the chemoreceptors then acts as a physical memory which  
676 represents the environment experienced by the cell a few seconds before, with which the current situation  
677 is compared.

678 We recall here the model of the chemotaxis pathway constructed in [59]. The chemoreceptor dimers  
679 were modeled as two-state variables interacting following a Monod-Wyman-Changeux allosteric model.  
680 The probability  $P_{\text{on}}$  of a signaling team of  $N_a$  Tar and  $N_s$  Tsr receptor dimers (and associated kinases) to  
681 be active is given by the free energy difference  $F$  between the active and inactive states as:

$$P_{\text{on}} = \frac{1}{1 + e^F} \quad (21)$$

682 with the free energy difference:

$$F = (N_a + N_s) \epsilon(m) + N_a \ln \left( \frac{1 + c/K_a^{\text{off}}}{1 + c/K_a^{\text{on}}} \right) + N_s \ln \left( \frac{1 + c/K_s^{\text{off}}}{1 + c/K_s^{\text{on}}} \right), \quad (22)$$

683 where  $K_i^{\text{off}}$  (resp.  $K_i^{\text{on}}$ ) is the binding affinity of the chemoattractant, present at concentration  $c$ , to the  
684 receptor  $i$  in its inactive (resp. active) state. The methylation dependent free energy difference  $\epsilon(m)$  is

685 linear by part, and defined as:

$$\epsilon(m) = \begin{cases} 1.0 - 0.5m, & 0 < m < 2 \\ -0.3(m - 2.0), & 2 < m < 4 \\ -0.6 - 0.25(m - 4.0), & 4 < m < 6 \\ -1.1 - 0.9(m - 6.0), & 6 < m < 7 \\ -2.0 - (m - 7.0), & 7 < m < 8 \end{cases} . \quad (23)$$

686 The methylation enzyme CheR methylates only inactive receptors with average rate  $k_R$ , and CheB demethylates only active ones with average rate  $k_B$ , so that the methylation level evolves according to:

$$\frac{dm}{dt} = k_R(1 - P_{\text{on}}) - k_B P_{\text{on}} \quad (24)$$

688 The previous set of equations makes the fraction of active teams  $P_{\text{on}}$  evolve in time, responding and adapting to the history of concentrations experienced by the cell  $c(t)$ . The balance between autophosphorylation of active kinases and phosphotransfer to CheY sets the fraction of phosphorylated CheA dimers  $A_p$  as:

$$A_p = \frac{k_A P_{\text{on}}}{k_A P_{\text{on}} + k_Y} . \quad (25)$$

691 Finally, the fast phosphorylation – dephosphorylation cycle of CheY sets the fraction of phosphorylated CheY as:

$$Y_p = 19.3610 \frac{k_Y A_p}{k_Y A_p + Z} . \quad (26)$$

693 If the cells are in the run state, the probability to tumble during the time step  $\delta t$  is given by:

$$p_{r \rightarrow t} = \exp(-\delta t (Y_p)^H / \tau_T) \quad (27)$$

694 If the cell is in a tumbling state, the probability to start running again is however independent of the CheY phosphorylation level:

$$p_{t \rightarrow r} = \exp(-\delta t / \tau_t) \quad (28)$$

696 All parameter values are given in Supplementary Table 2 and are as in [59] except for  $N_a$  and  $N_s$  which were chosen to match the values expected at the OD<sub>600</sub> to which our cells are grown [75].

698 **Prediction for the chemotactic drift in shallow gradients** – We write here in our notations the results of Dufour *et al.* [51]. From Eq. 3 of this paper, because our simulations are 2D and the adapted value of  $Y_p$  is 1, we have:

$$v_{\text{ch}} = (1 - TB)v_0^2 N_a \nabla f(c) / 2 \frac{\partial \ln \tau_{\text{dec}}}{\partial F} \frac{1}{1/\tau_R + 1/\tau_T + 1/\tau_m} \quad (29)$$

701 were  $(1 - TB) = \tau_r / (\tau_t + \tau_r)$  is the fraction of running cells at any given time in absence of a gradient,  $\tau_m = 0.5(N_s + N_a)P_{\text{on}}(1 - P_{\text{on}})(k_R + k_B)$  is the relaxation time of  $F$  according to Eq. 22 and 24,  $1/\tau_{\text{dec}} = 1/\tau_R + 1/\tau_T$ , and the derivative is taken at the adapted value  $F = \ln 2$ . We have also defined the Brownian reorientation time  $\tau_R = 1/D_r$ , and the tumbling reorientation time  $\tau_T = \tau_r(Y_p)^{-H} / (1 - \exp(-D_T \tau_t))$ . The latter accounts for the incomplete randomization due to finite tumbling time [52], which was not accounted for in Dufour *et al.* [51] because complete randomization was assumed. We now consider that:

$$\frac{\partial \ln \tau_{\text{dec}}}{\partial F} = -\tau_{\text{dec}} \frac{\partial (Y_p)^H}{\partial F} (1 - \exp(-D_T \tau_t)) / \tau_r = -H \frac{\tau_{\text{dec}}}{\tau_T} \frac{1}{Y_p} \frac{\partial Y_p}{\partial F} \quad (30)$$

707 We also have from Eq. 21, 25 and 26 that:

$$\frac{1}{Y_p} \frac{\partial Y_p}{\partial F} = -\left(1 - \frac{k_Y A_p}{k_Y A_p + Z}\right) \left(1 - \frac{k_A P_{on}}{k_A P_{on} + k_Y}\right) (1 - P_{on}) \simeq -(1 - P_{on}) \quad (31)$$

708 since the other factors are very close to 1, when one considers that they have to be evaluated for  $F = \ln 2$ .  
709 We then have:

$$v_{ch} = v_0^2 (1 - TB) N_a H (1 - P_{on}) / 2 \frac{\tau_R}{\tau_R + \tau_T} \frac{1}{1/\tau_R + 1/\tau_T + 1/\tau_m} \nabla f(c) \quad (32)$$

710 which corresponds to Eq. 2 (and equivalently 4) of the main text, with the coefficients given in Supple-  
711 mentary Table 2.

### 712 **Supplementary Note 3. Chemotactic behavior in simulations in absence** 713 **of hydrodynamic interactions**

714 Supplementary Fig. 7 shows the main characteristics of the collective motility and the drift in the sim-  
715 ulations where hydrodynamic interactions are neglected. Note that the rotational Brownian motion was  
716 also neglected. The characteristics of the collective motion, as measured by the flow structure factor  $E(q)$ ,  
717 were set by the cell length  $L$  (Supplementary Fig. 7b-d). The chemotactic drift first decreased with area  
718 fraction, before increasing, peaking and decreasing again for  $L = 3 \mu\text{m}$  and  $4 \mu\text{m}$  (Supplementary Fig. 7e).  
719 Contrary to the experiments, there was no scaling with  $E(q_{str})$  (Supplementary Fig. 7f).

720 Interestingly, the velocity decorrelation time  $\tau_{dec}$  extracted from the time autocorrelation of the single  
721 cell velocity (Supplementary Fig. 7g) decreased monotonously in all conditions as a function of area  
722 fraction (Supplementary Fig. 10a), as it did when hydrodynamics was accounted for. However, in the dry  
723 case, the chemotactic coefficient, considering its dependence in  $\tau_{dec}$ , did not follow Eq. 4 of the main text  
724 (Supplementary Fig. 7h), contrary to the full simulations (main Fig. 4h). Clearly, at the densities where  
725 the drift started to reincrease, the system started to depart from the framework of Eq. 4 of the main text,  
726 which assumes a Brownian motion like reorientation process and shallow gradients, i.e. that the average  
727 pathway activity  $P_{on}$  departs only slightly from its adapted value. Because it occurs at a fairly high cell  
728 density, it is however not clear if the peak observed here occurs for the same reasons as the one observed  
729 in the experiments.

### 730 **Supplementary Note 4. Dual effect of physical interactions on the chemo-** 731 **tactic drift**

732 An extension of the model we used so far to explain chemotactic drift reduction (i.e. [51] leading to Eq.  
733 2-4 of the main text) was proposed in Long *et al.* [54]. There, this extension was used to explain non-linear  
734 reinforcement of the chemotactic drift when the gradient is sharp enough. It therefore does not assume  
735 shallow gradients anymore, and is based on a Schmolukovski equation for the space-averaged probability  
736  $P(t, F, s)$  to be at time  $t$  with a chemoreceptor free energy  $F$  and an orientation  $s = \mathbf{n} \cdot \nabla c / \|\nabla c\|$  [54]:

$$\partial_t P = -\partial_F \left( \left( -(F - F_0) + \frac{r(F)s}{H\tau_E} \right) P \right) + \frac{\hat{L}_s P}{\tau_D(F)}. \quad (33)$$

737 Here time is normalized to the adaptation time  $\tau_m$  and  $r(F)$  is the probability of the cell being running, given  
738 the receptor free energy  $F$ . The first right hand side term describes the chemoreceptor free energy actuation

739 according to adaptation (term  $-(F - F_0)$  with  $F_0$  the adapted, unstimulated, value of  $F$ ;  $F_0 = \ln 2$  in our  
 740 case) and stimulation due to swimming in the gradient (with  $1/H\tau_E$  being the normalized gradient, defined  
 741 in Supplementary Table 2 for our case). The second term describes reorientations due to Brownian rota-  
 742 tional diffusion and tumbles, with  $\hat{L}_s$  the rotational diffusion operator and  $\tau_D = 1/(\tau_m(rD_r + (1-r)D_T))$   
 743 comparing reorientation and adaptation times. Assuming that the detailed balance in the angular fluxes of  
 744 cell orientation hold, we can include in this second term the effect of collective reorientations in the form  
 745 of an effective enhanced rotational diffusion  $D_r \rightarrow D_r + D_{\text{coll}}^{\text{eff}}$ . Integrating this equation over orientations,  
 746 in Long *et al.* [54] it is shown that at steady state in the gradient:

$$v_{\text{ch}}/v_0 = \langle rs \rangle = H\tau_E \langle F - F_0 \rangle \quad (34)$$

747 Here the chemotactic ratio  $v_{\text{ch}}/v_0$  is the product of the normalized gradient strength and of the average  
 748 over all positions, orientations and times of the shift in chemoreceptor free energy from its adapted value  
 749 (CFES,  $\langle F - F_0 \rangle$ ). Key assumptions for derivating this equation are steady-state and detailed balance  
 750 holding. In this equation, the effect of reorientations (tumbles, Brownian motion and possibly collective  
 751 reorientations) on the drift is accounted for by a reduction of the CFES. In the simulations (contrary to  
 752 experiments), the CFES is readily accessible, and it evolves similarly to the drift as a function of volume  
 753 fraction (Supplementary Figs. 9b and 10b). The chemotactic ratio  $v_{\text{ch}}/v_0$  follows Eq. 34 as a function of  
 754  $\langle F - F_0 \rangle$  fairly well in the simulations accounting for hydrodynamics (Supplementary Fig. 9c), but less so  
 755 for the dry simulations (Supplementary Fig. 10c). Upon closer inspection using the ratio

$$\frac{v_{\text{ch}}/v_0}{H\tau_E \langle F - F_0 \rangle} \quad (35)$$

756 we find that the ratio decreases in both cases below 1 when collective reorientations increase, as measured  
 757 by the decrease of the decay time of the autocorrelation of the cell velocity,  $\tau_{\text{dec}}$  (Supplementary Figs. S9d  
 758 and S10d). This deviation from Eq. 34 is weaker when hydrodynamics is included. Since we ensured that  
 759 steady state is reached (in 1000 frames, 10 s of real time equivalent) before measuring the averages, we  
 760 deduce that this discrepancy must come from detailed balance in the angular fluxes not being respected.  
 761 Indeed, detailed balance assumes that:

$$P(s)\phi(s \rightarrow s + ds) = P(s + ds)\phi(s + ds \rightarrow s) \quad (36)$$

762 where  $\phi(s \rightarrow s + ds)$  is the flux of cells changing their orientation from  $s$  to  $s + ds$  over a small amount  
 763 of time, and it is not necessarily satisfied when hydrodynamics- and collision-induced reorientations are  
 764 concerned. Indeed, vortices are a net flux of orientation which thus cannot satisfy Eq. 36. Therefore, when  
 765 hydrodynamics is included and even more so in the dry simulations, the effect of cell-cell interactions is  
 766 not fully comparable to Brownian motion (for which detailed balance holds), and we prefer in this sense to  
 767 talk about active enhancement of rotational diffusion, where  $H\tau_E \langle F - F_0 \rangle$  represents the drift if detailed  
 768 balance was holding, and the ratio (35) is a measure of the effect of detailed balance breakdown.

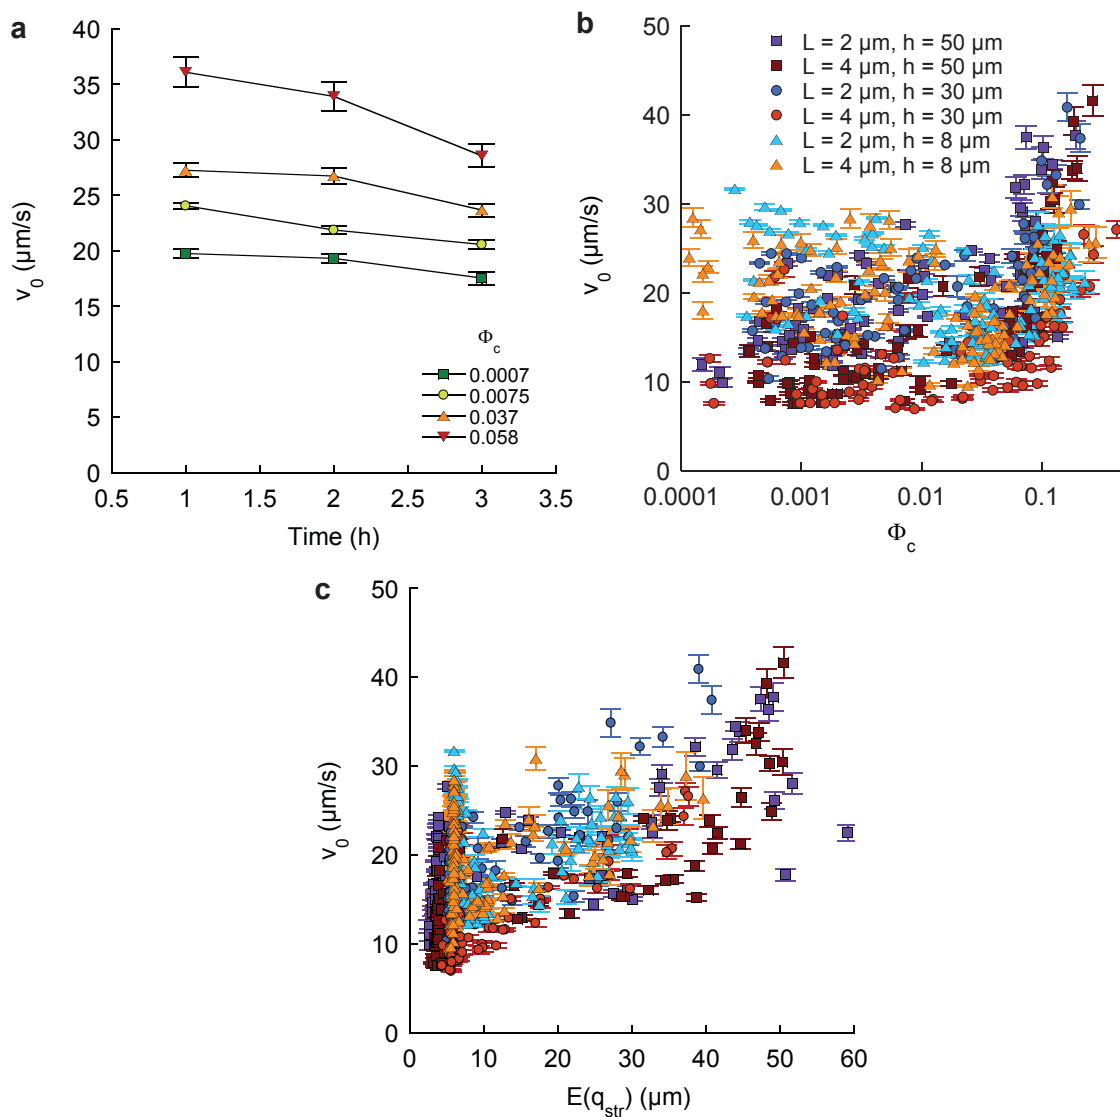

**Supplementary Figure 5.** (a) Examples of average swimming speed as a function of the time since sample preparation for normal cells in  $50 \mu\text{m}$  high channels at indicated cell densities. The experiments were performed during the first three hours, for which swimming speed is fairly constant. (b) Average swimming speed, for all individual measurements, plotted as a function of cell body volume fraction. (c) The swimming speeds for all conditions were function of the amplitude of the collective motion, as defined in the main text, at high cell density. (b-c) Error bars represent measurement error.



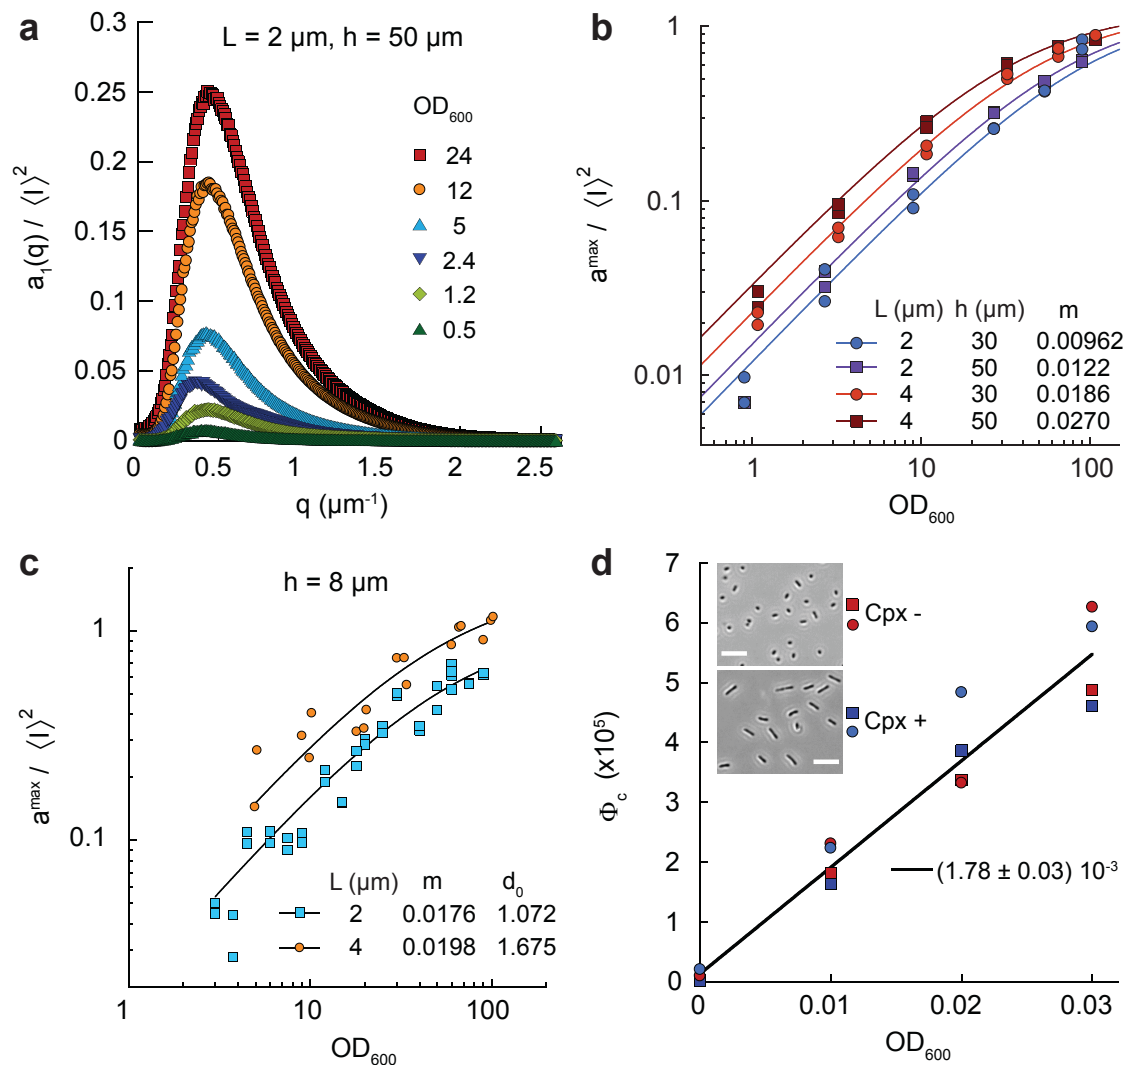

**Supplementary Figure 6.** *In situ* calibration of the cell body volume fraction. (a) The normalized amplitude of the differential intensity correlation function  $a_1/I^2$ , measured here in chemically homogeneous microfluidic devices, exhibits a maximum as a function of the spatial wave number  $q$ , which increases with the optical density. (b) The maximum value of  $a_1/I^2$  can be fitted as  $a_1^{\text{max}}/I^2 = 1.25 m OD_{600}/(1 + m OD_{600})$ , with  $m$  depending on cell length  $L$  and channel height  $h$ , indicated in  $\mu\text{m}$ . (c) For channel height  $h = 8 \mu\text{m}$ , the better adapted formula  $a_1^{\text{max}}/I^2 = d_0 m OD_{600}/(1 + m OD_{600})$  was used. (d) The cell body volume fraction  $\Phi_c$  was calibrated as a function of optical density for the single spectrophotometer used in the study, by cell counting in flow cytometry and length measurement in microscopy. The optical density was a single linear function of  $\Phi_c$ , irrespective of cephalixin treatment. (Inset) Typical phase contrast images for cell length measurements, with and without cephalixin (Cpx) treatment. Scale bars are  $10 \mu\text{m}$ .

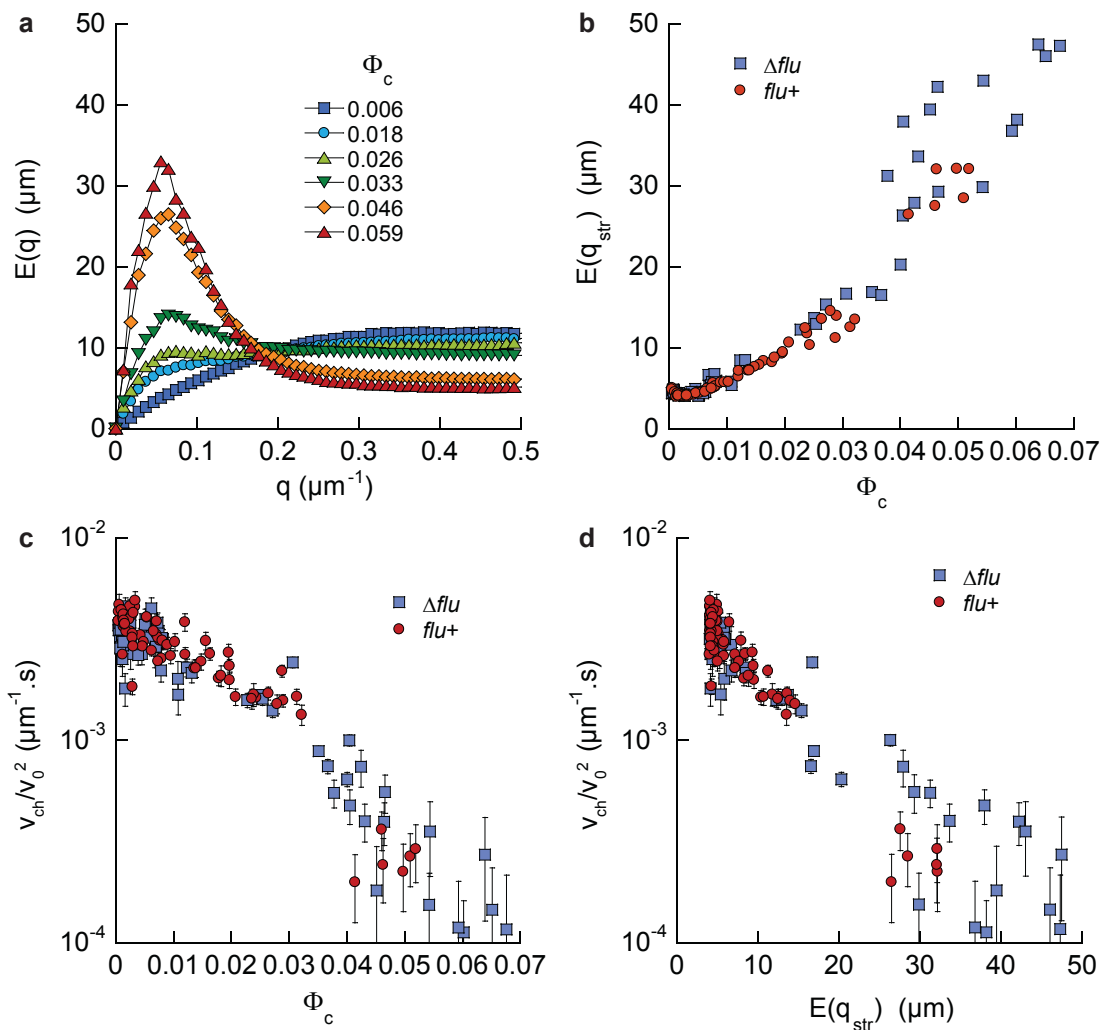

**Supplementary Figure 7.** Comparison of the behavior of  $flu+$  and  $\Delta flu$  cells. (a) The spatial power spectral density  $E(q)$  measured in the  $50 \mu\text{m}$  high channels exhibited a peak at  $\pi/q_{str} = 50 \mu\text{m}$ , as in the  $\Delta flu$  mutant, growing with cell density. (b) The maximum value of  $E(q)$  grew in exactly the same manner for both strains. (c-d) The normalized chemotactic drift had the same dependence on the cell body volume fraction (c) and on the amplitude of the collective motion  $E(q_{str})$  (d) in both strains.

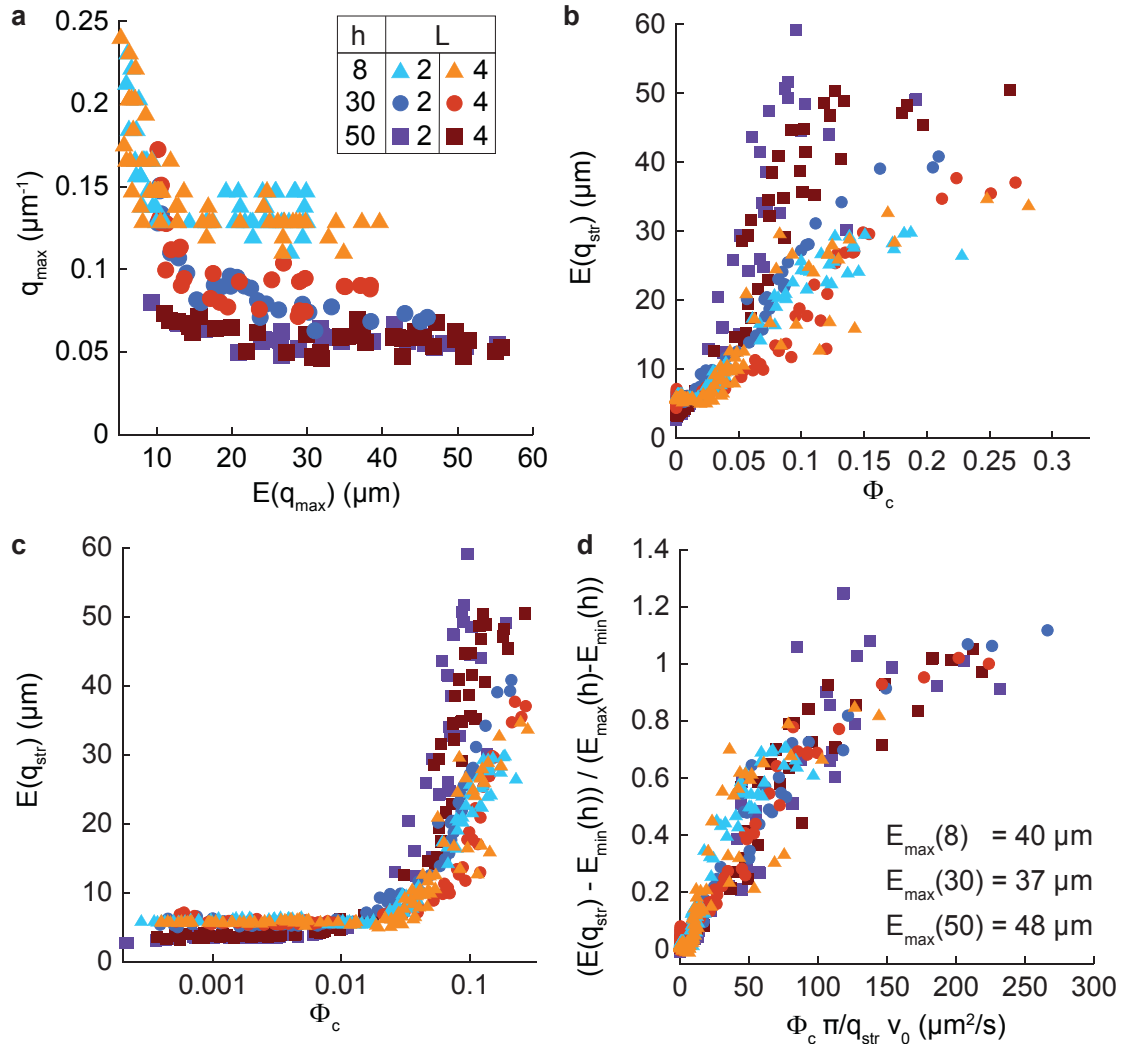

**Supplementary Figure 8.** Supplemental analysis of the collective motion. **(a)** Wave number  $q_{\max}$  for which the maximum of  $E(q)$  is reached as a function of this maximum  $E(q_{\max})$ , for all conditions. When the amplitude of the collective motion as quantified by  $E(q_{\max})$  is high,  $q_{\max}$  reaches a plateau at  $q_{str}$ , which depends in first approximation only on the height  $h$  of the channel. Each point represents a single experiment. **(b)** Amplitude  $E(q_{str})$  of the collective motion, measured at the plateau wave number  $q_{str}(h)$ , for each individual experiments, and used to draw Fig. 2c. We used  $q_{str}(8 \mu\text{m}) = 0.15 \mu\text{m}^{-1}$ ,  $q_{str}(30 \mu\text{m}) = 0.093 \mu\text{m}^{-1}$  and  $q_{str}(50 \mu\text{m}) = 0.055 \mu\text{m}^{-1}$ . **(c)** Same as **b** with  $\Phi_c$  in logarithmic scale. **(d)**  $E(q_{str})$ , when corrected for its low density value  $E_{\min}(q_{str}(h))$  and normalized to the value at which it saturates at large density  $E_{\max}(h)$ , appears to be a single function of the cell body volume fraction times typical vortex size times swimming speed ( $\Phi_c \pi / q_{str} v_0$ ).

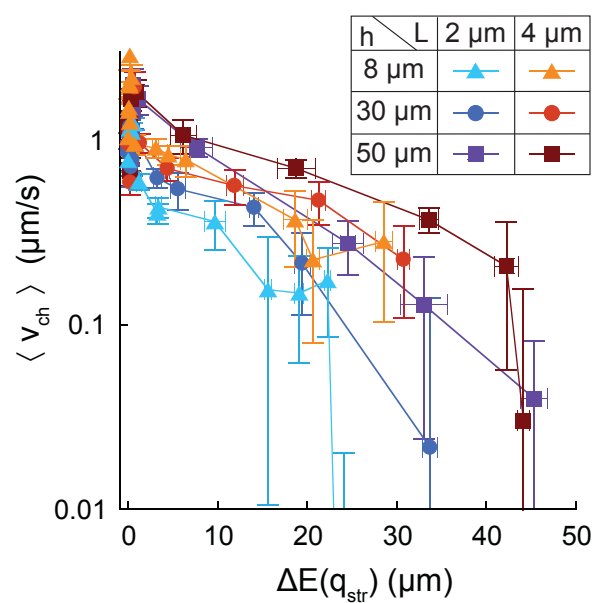

**Supplementary Figure 9.** Chemotactic drift  $v_{ch}$  as a function of the amplitude of the collective motion  $\Delta E(q_{str})$ . It decreases in all experimental conditions.

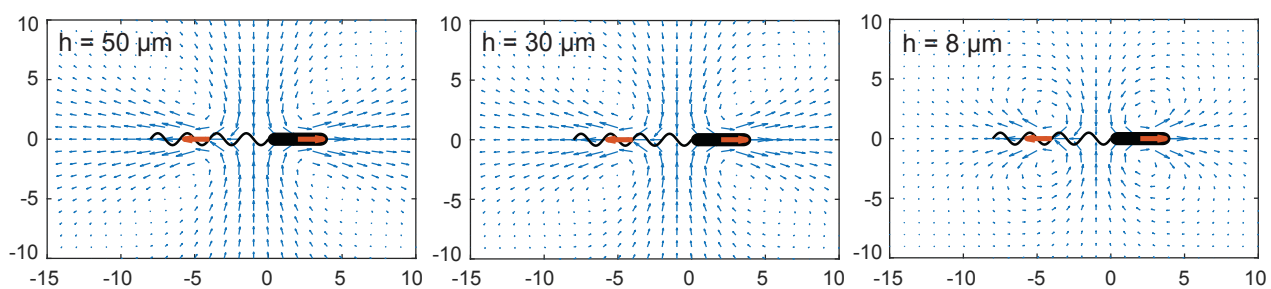

**Supplementary Figure 10.** Flow field generated around a swimmer for the three simulated heights.

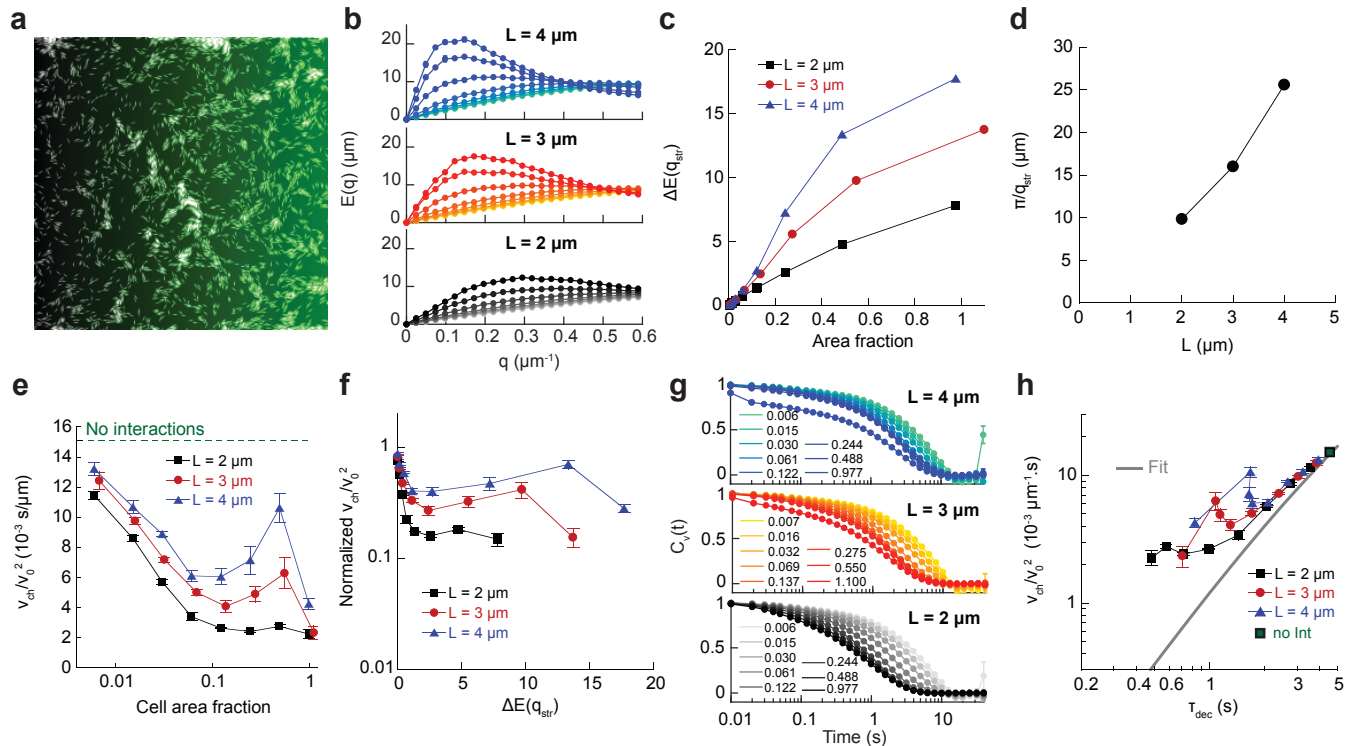

**Supplementary Figure 11.** Numerical simulations of self-propelled chemotactic rods considering only steric interactions. (a) Snapshot of a simulation, with linear gradient imprinted in green (area fraction 0.244,  $L = 4$ ). (b) Flow structure factor  $E(q)$  for increasing volume fractions and indicated aspect ratios, showing a peak at  $q_{str}$  scaling with the aspect ratio. (c) Maximum  $E(q_{str})$ , subtracted of its low density value, as a function of cell area fraction. Note that contrary to experiments and the wet case,  $E(q_{str})$  grows more slowly for shorter cells. (d) The typical size of the vortices depends on the cell aspect ratio, contrary to experiments and the wet case. (e) Chemotactic coefficient as a function of cell area fraction for the indicated aspect ratios. The green dotted line represents the value in absence of interactions. As in the experiments, it decreases and exhibit a peak for large aspect ratios. (f) Chemotactic coefficient as a function of the amplitude  $E(q_{str})$ . (g) Time autocorrelation of the cell velocity  $C_v(t)$  for the indicated cell area fractions and aspect ratios. (h) Chemotactic bias  $v_{ch}/v_0$  as a function of the normalized decorrelation time. The gray line represents the fit by Eq. 4 of the main text. The green dot represents the value in absence of all interactions.



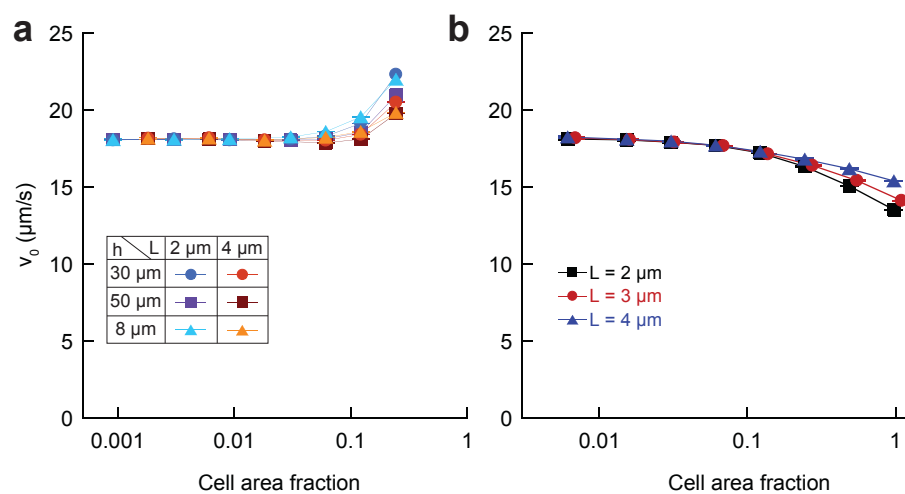

**Supplementary Figure 12.** Average swimming speed of the cells in the simulations in presence (a) or in absence of hydrodynamic interactions (b) as a function of cell volume fraction, for indicated cell lengths  $L$ , and channel heights  $h$  in the hydrodynamic case.

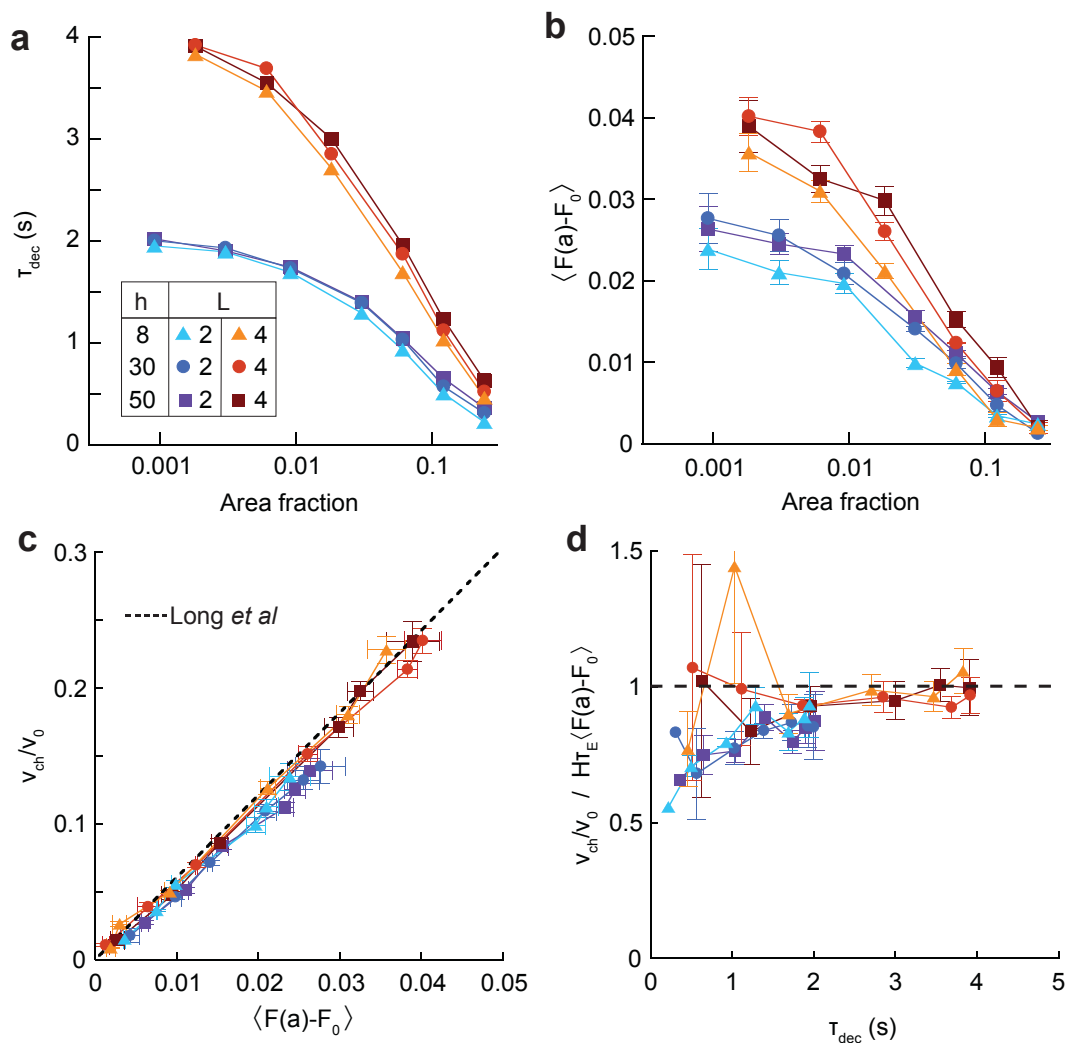

**Supplementary Figure 13.** Decorrelation time analysis in the simulations including hydrodynamics. (a) Decorrelation time, taken as  $C_v(\tau_{\text{dec}}) = 0.5$  for the indicated simulation parameters. (b) Chemoreceptor free energy shift (CFES) as a function of area fraction (c) The chemotactic bias as a function of the CFES. The dotted line is the prediction of Long *et al.* [54]. (d) The normalized bias divided by the CFES as a function of the decorrelation time.

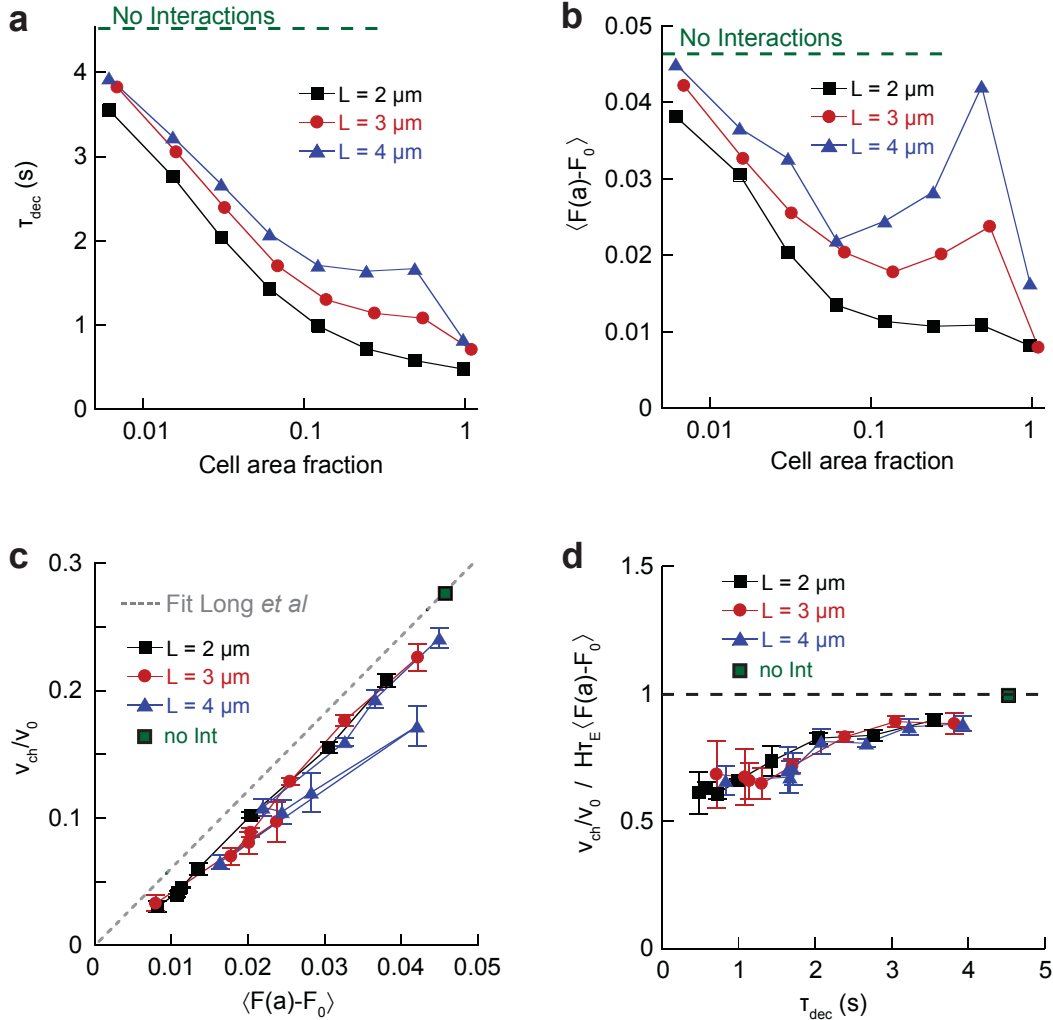

**Supplementary Figure 14.** Decorrelation time analysis in the dry simulations. (a) Cell velocity decorrelation time  $\tau_{dec}$ , defined by  $C_v(\tau_{dec}) = 0.5$  as a function of the area fraction. (b) The chemoreceptor free energy shift (CFES) is non monotonous as a function of area fraction. (c) Normalized chemotactic bias as a function of the normalized CFES. The gray dotted line represents the linear expectation from theory satisfying detailed balance [54]. (d) The normalized bias divided by the CFES, representing the fraction of the drift explainable assuming detailed balance is satisfied, as a function of the decorrelation time. (a-d) The green dotted line (a-b) or dot (c,d) represents the value in absence of all interactions.

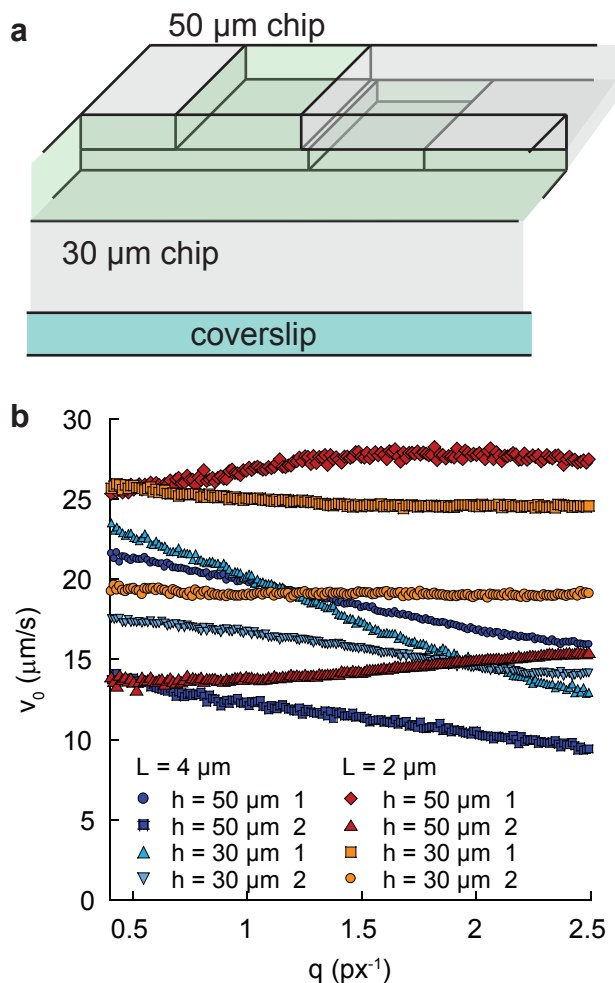

**Supplementary Figure 15.** Calibration of the velocity measurement by DDM. (a) Scheme of the geometry to compare DDM measurements of velocities in the 30 (or 8)  $\mu\text{m}$  and 50  $\mu\text{m}$  devices. The two devices are facing each other and measurements can be done on the same suspension of cells in both channels. (b) Typical velocity outputs of the fit of the differential image correlation functions as a function of the wave number  $q$ , for the various experimental conditions. The effective velocity decreases for the longer cells, because of the anisotropy effect (see Supplementary note 5). The slight increase for the shorter cells was attributed to tumbles in earlier studies [46, 47].

769 **Supplementary Table 1.** Spincoating parameters

| height ( $\mu\text{m}$ ) | SU8  | spincoat speed (rpm) |
|--------------------------|------|----------------------|
| 50                       | 2050 | 1500                 |
| 30                       | 2050 | 3000                 |
| 8                        | 2015 | 2500                 |

770

771 **Supplementary Table 2.** Parameters of the simulations

|                         |                                                                     |                         |
|-------------------------|---------------------------------------------------------------------|-------------------------|
| $v_0$                   | $20 \mu\text{m}\cdot\text{s}^{-1}$                                  |                         |
| $dv_0$                  | $2 \mu\text{m}\cdot\text{s}^{-1}$                                   |                         |
| $\delta t$              | $10^{-4} \text{ s}$                                                 |                         |
| 1 frame                 | $10^{-2} \text{ s}$                                                 |                         |
| $\nabla c/c_0$          | $2 \cdot 10^{-4} \mu\text{m}^{-1}$                                  |                         |
| $c_0$                   | $10^2 \mu\text{M}$                                                  |                         |
| Chemotaxis pathway      |                                                                     |                         |
| $\tau_r$                | 1 s                                                                 |                         |
| $\tau_t$                | 0.1 s                                                               |                         |
| $H$                     | 10                                                                  |                         |
| $N_a$                   | 10                                                                  |                         |
| $N_s$                   | 10                                                                  |                         |
| $K_a^{\text{off}}$      | 20 $\mu\text{M}$                                                    |                         |
| $K_a^{\text{on}}$       | 3 mM                                                                |                         |
| $K_s^{\text{off}}$      | 1 mM                                                                |                         |
| $K_s^{\text{on}}$       | 10 mM                                                               |                         |
| $k_R$                   | $0.0182 \text{ s}^{-1}$                                             |                         |
| $k_B$                   | $0.0364 \text{ s}^{-1}$                                             |                         |
| $Z$                     | 31                                                                  |                         |
| $k_A$                   | 5                                                                   |                         |
| $k_Y$                   | 100                                                                 |                         |
| Interaction parameters  |                                                                     |                         |
| $K_{\text{el}}/\eta$    | $10 \mu\text{m}^{1/2}\cdot\text{s}^{-1}$                            |                         |
| $K_{\text{fr}}/\eta$    | 0.1 $\mu\text{m}$                                                   |                         |
| Cell parameters         |                                                                     |                         |
| $L$                     | 2 $\mu\text{m}$                                                     | 4 $\mu\text{m}$         |
| $D_T$                   | $6.7 \text{ s}^{-1}$                                                | $4.2 \text{ s}^{-1}$    |
| $D_r$                   | $0.1 \text{ s}^{-1}$                                                | $0.0125 \text{ s}^{-1}$ |
| $L_{\text{flag}}$       | 10 $\mu\text{m}$                                                    | 10 $\mu\text{m}$        |
| Modelisation parameters |                                                                     |                         |
| Gain $G$                | $\tau_r/(\tau_r + \tau_t) H N_a (1 - P_{\text{on}})/2$              |                         |
| $\tau_m$                | $0.5(N_s + N_a)P_{\text{on}}(1 - P_{\text{on}})(k_R + k_B)$         |                         |
| $\nabla f(c)$           | $\nabla c (1/(c_0 + K_a^{\text{off}}) - 1/(c_0 + K_a^{\text{on}}))$ |                         |
| $\tau_0$                | $\tau_r/(Y_p)^H$                                                    |                         |
| $1/H\tau_E$             | $N_a\tau_mv_0\nabla c/c_0$                                          |                         |

772
